# Supplementary material for: Resistivity and Density Structure of Limboto Lake—Pentadio, Gorontalo, Indonesia Based on Magnetotelluric and Gravity Data
Source: MDPI journal article supplement (doi:10.3390/app13010644), 2023-01-03

**Supplementary Material 1.** The curves of apparent resistivity and phase of impedance for all the measuring stations

## MT-01

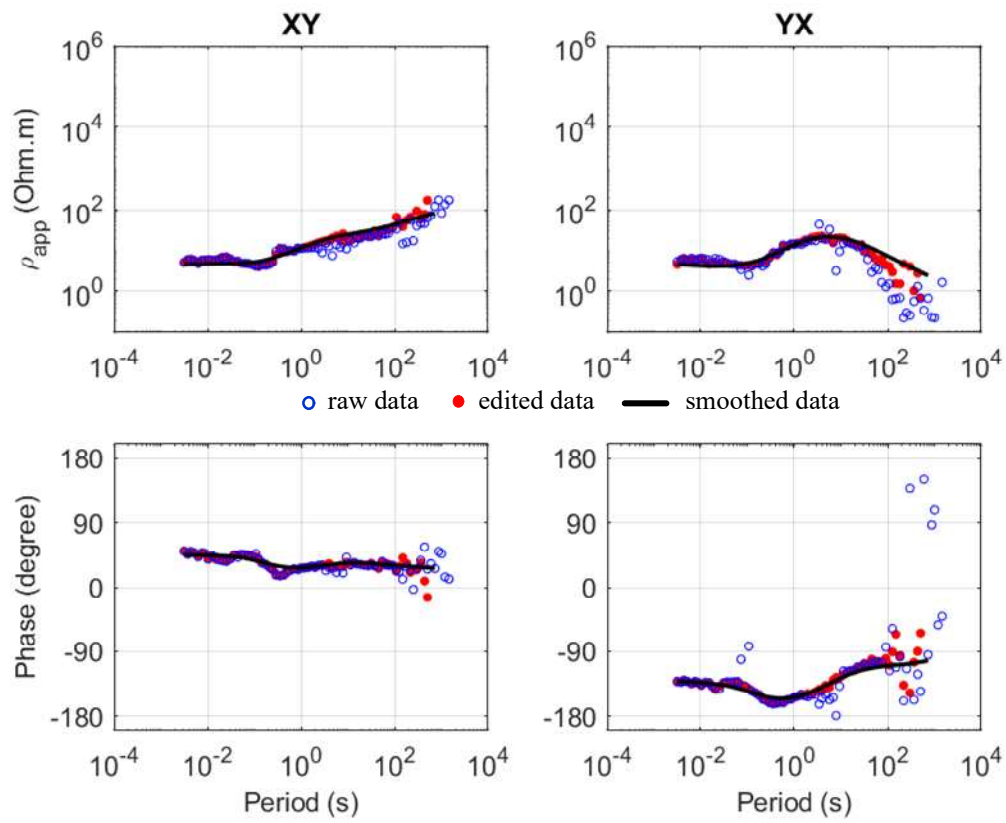

## MT-02

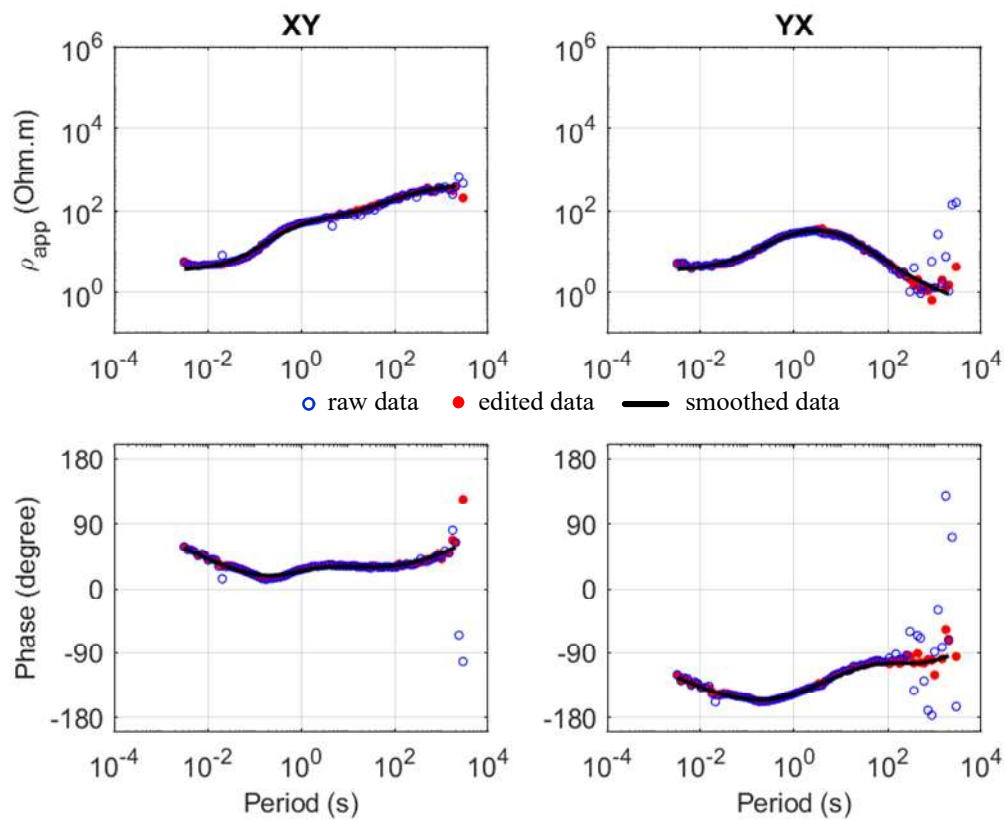

## MT-03

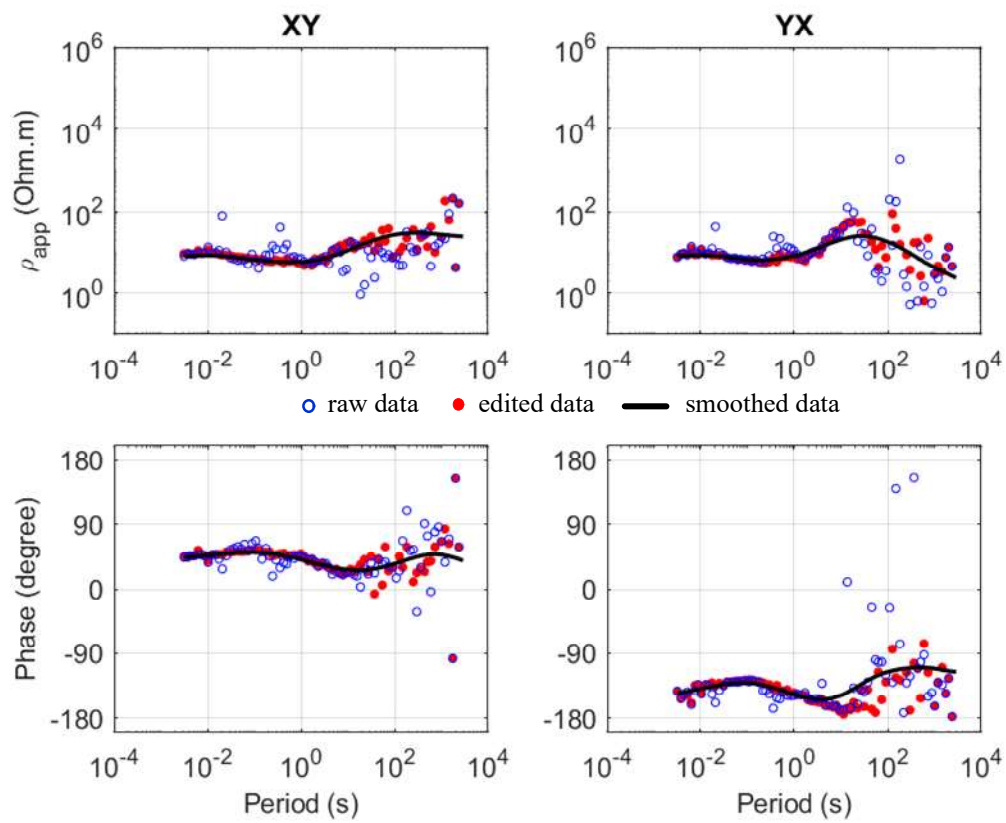

## MT-05

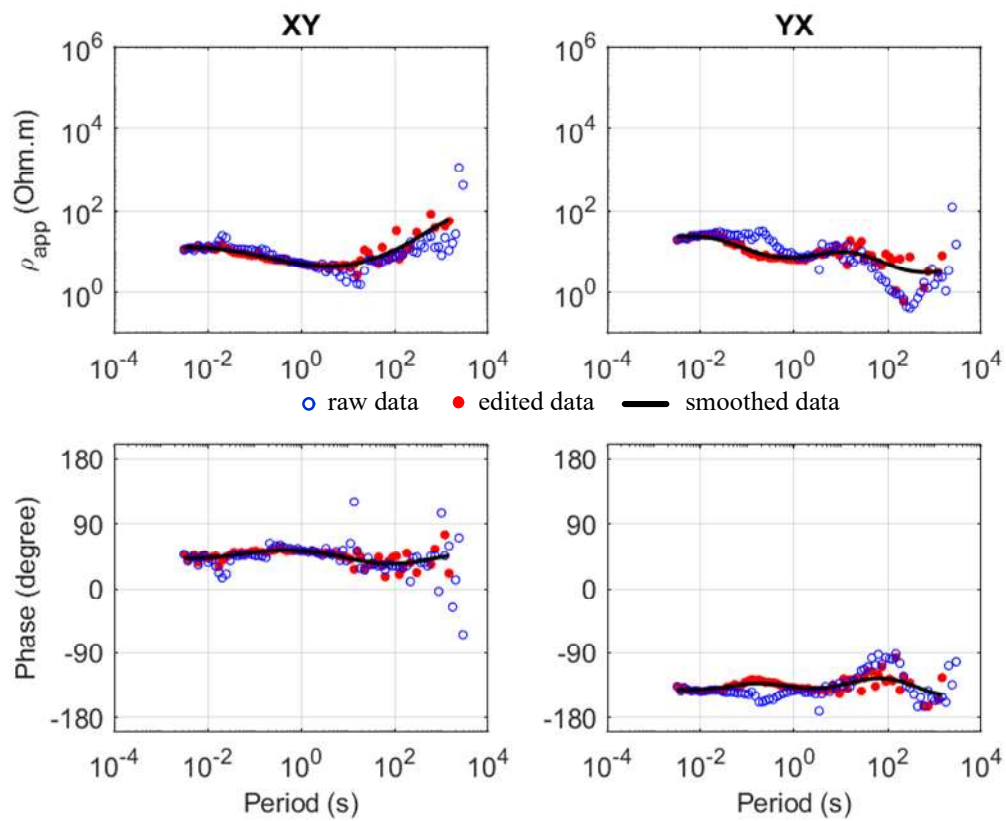

## MT-07

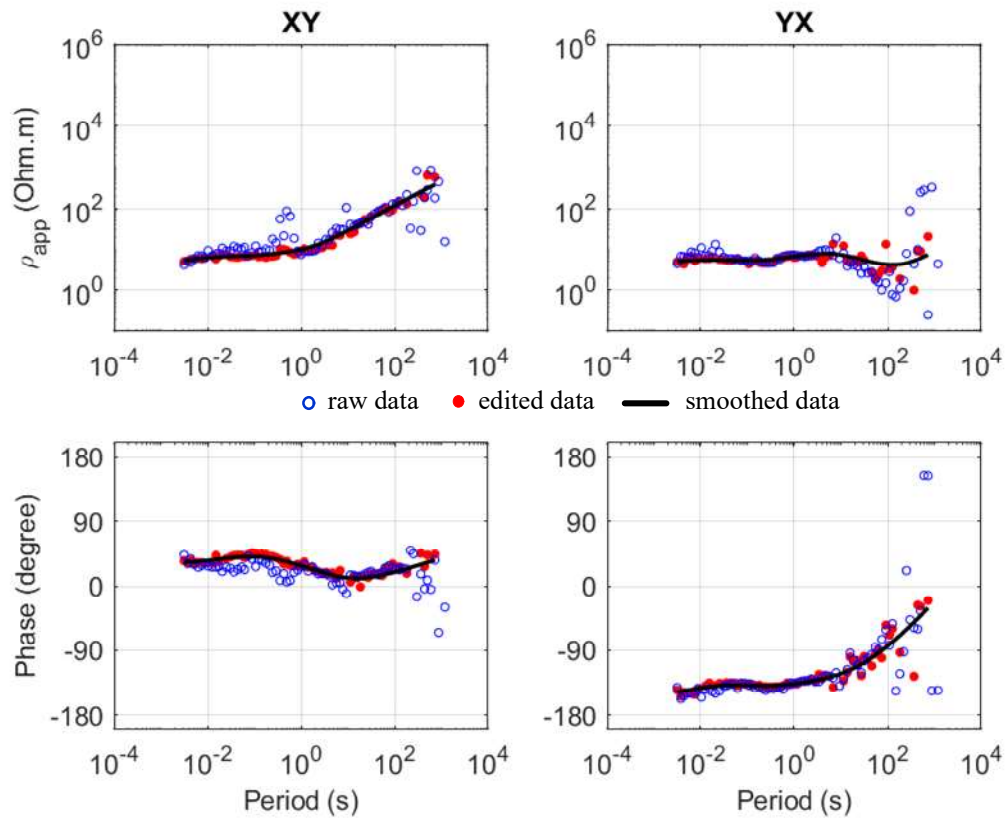

## MT-08

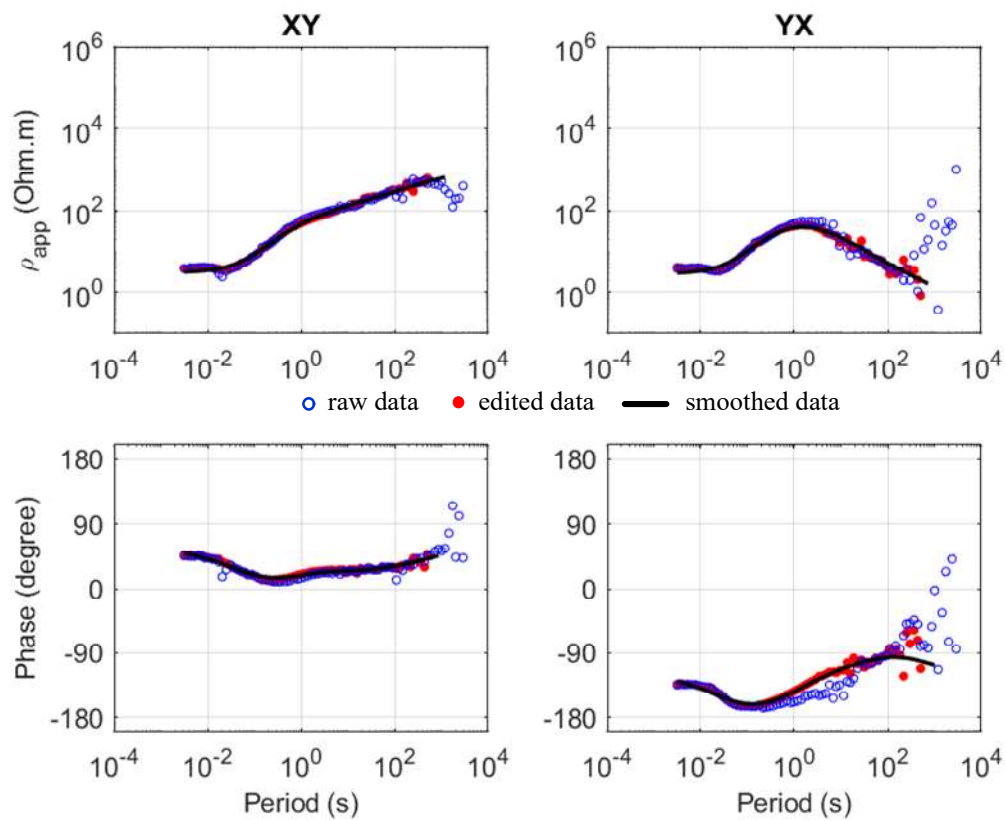



## MT-09

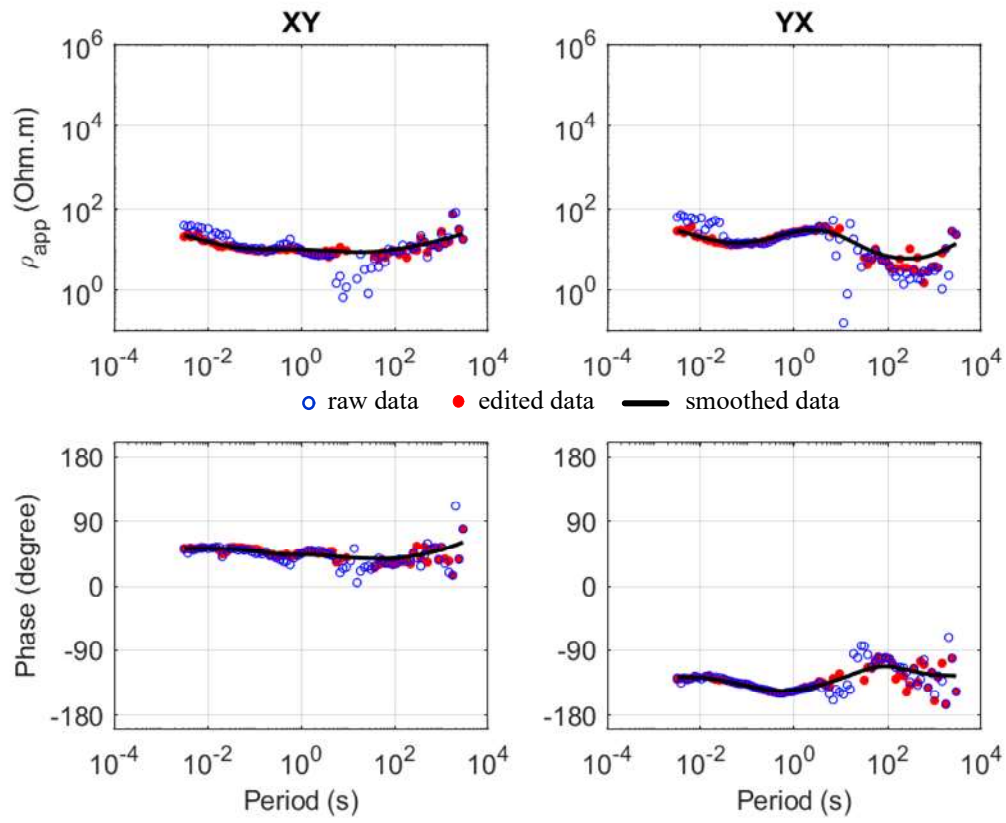

## MT-10

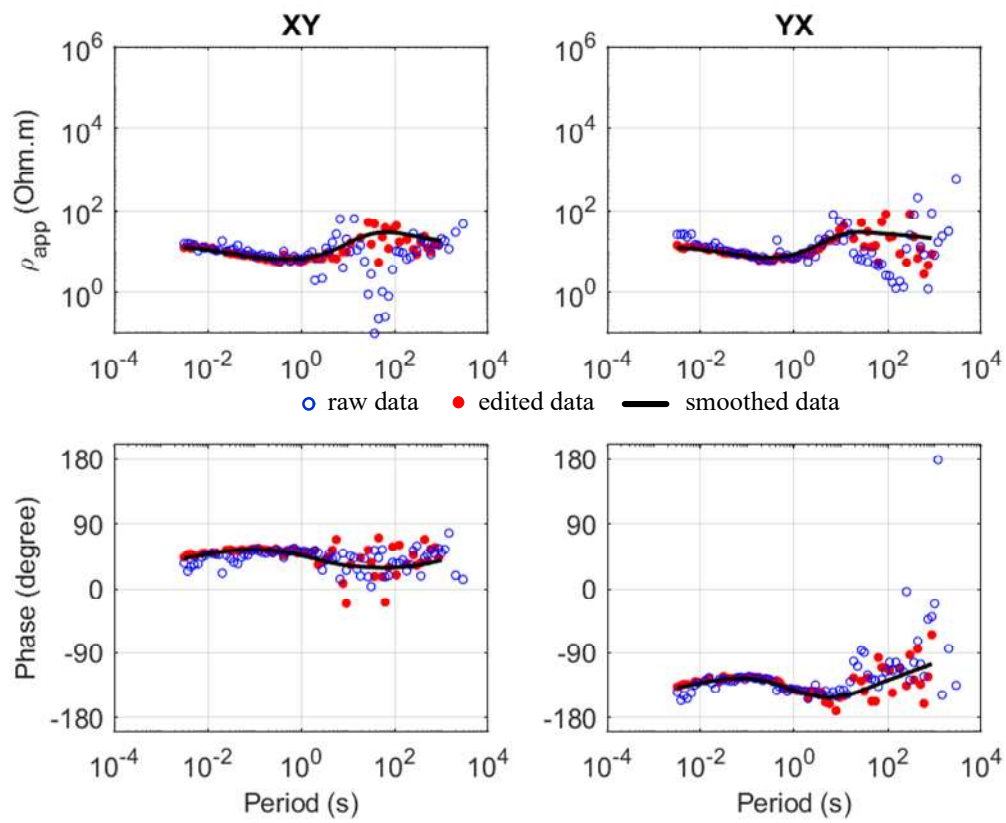

## MT-11

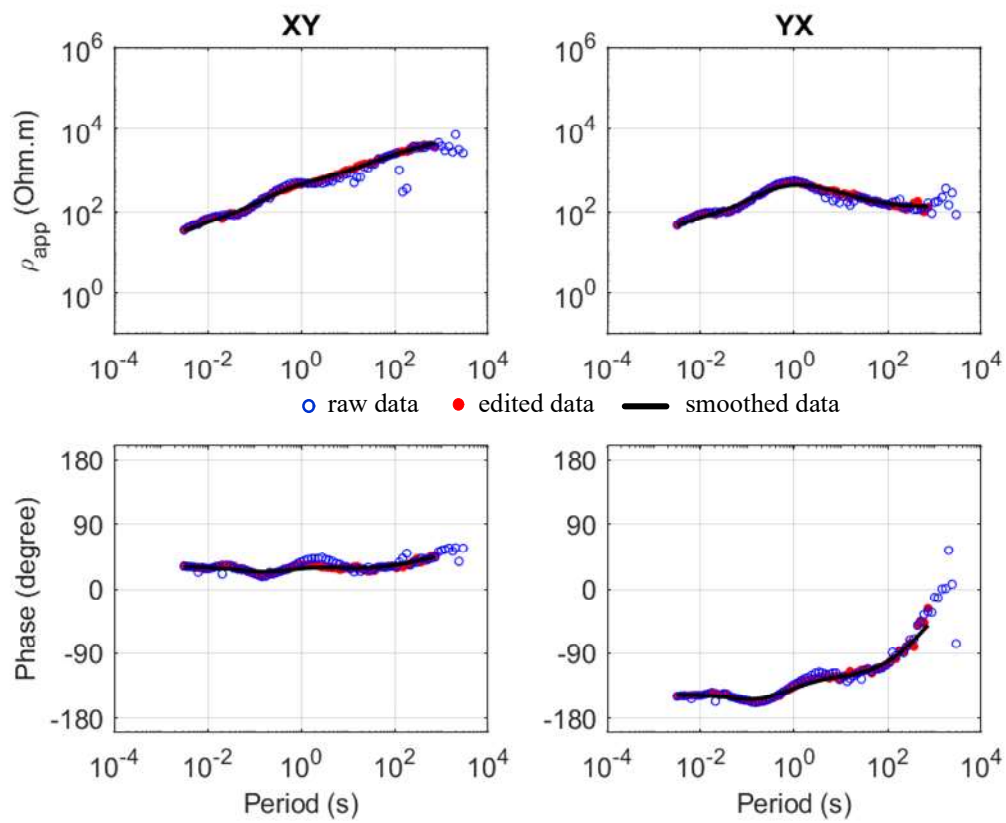

## MT-12

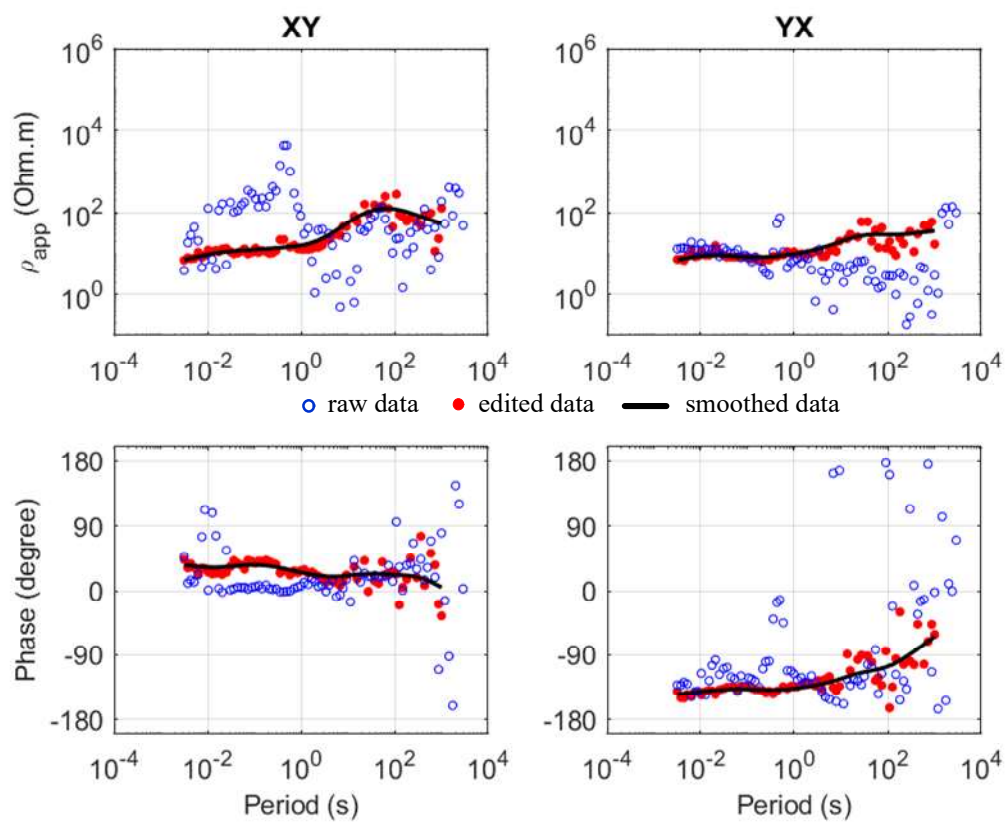

## MT-13

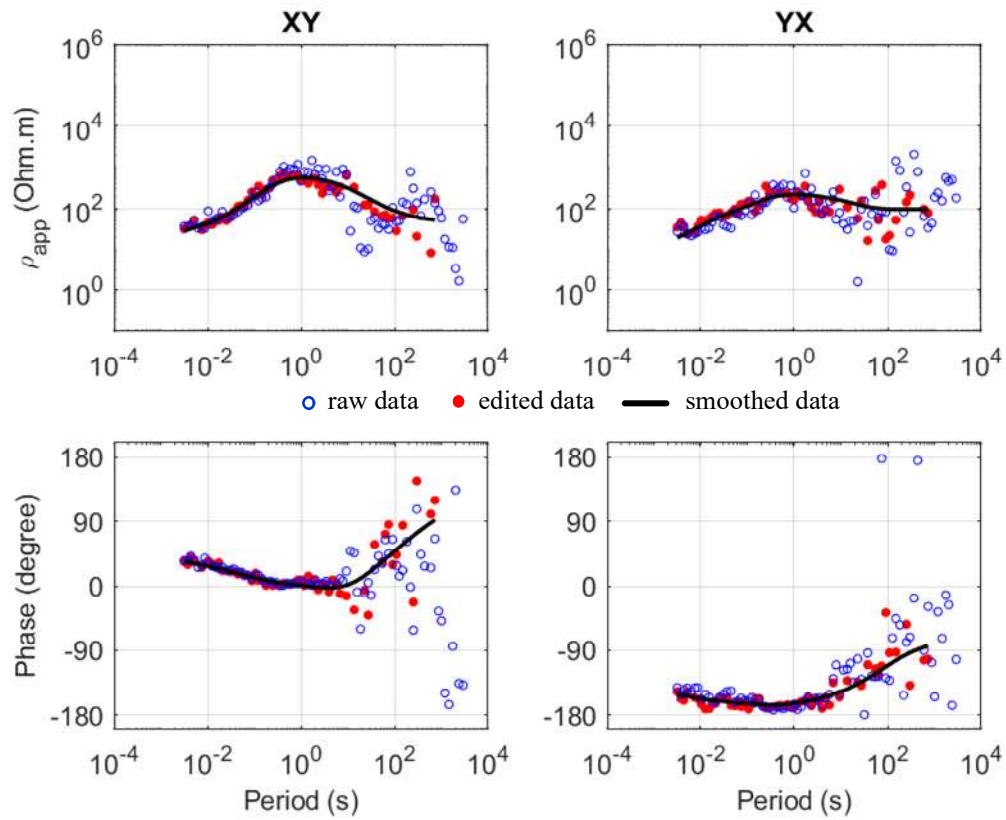

## MT-15

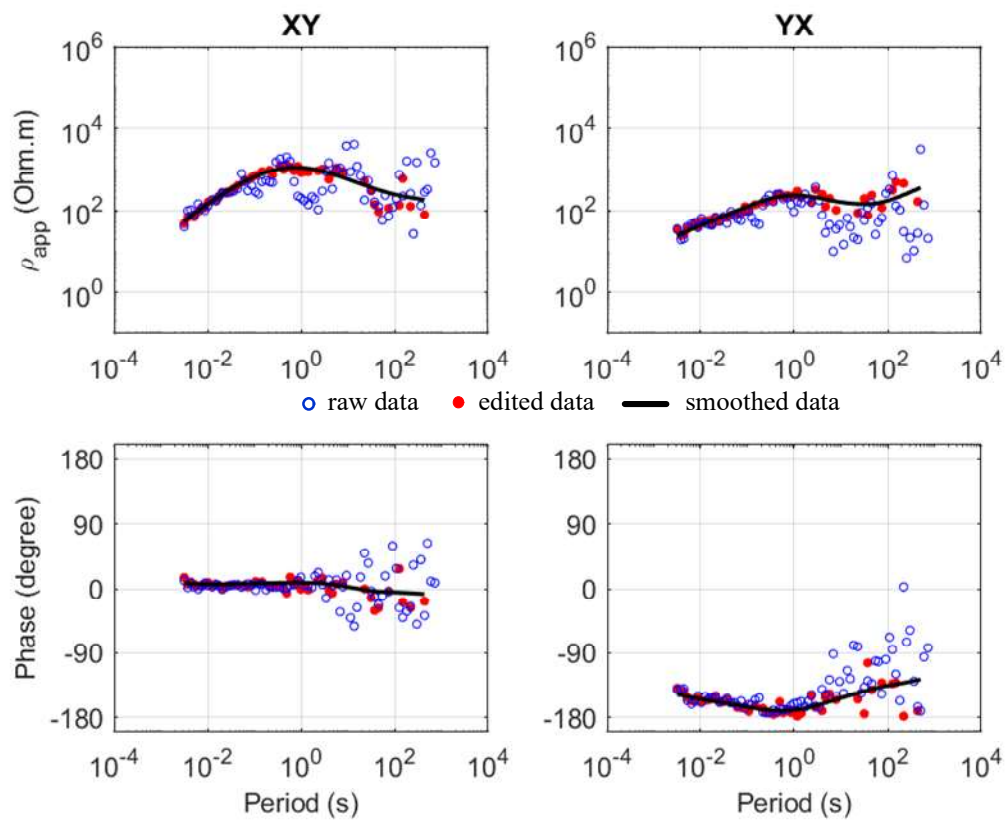

## MT-17

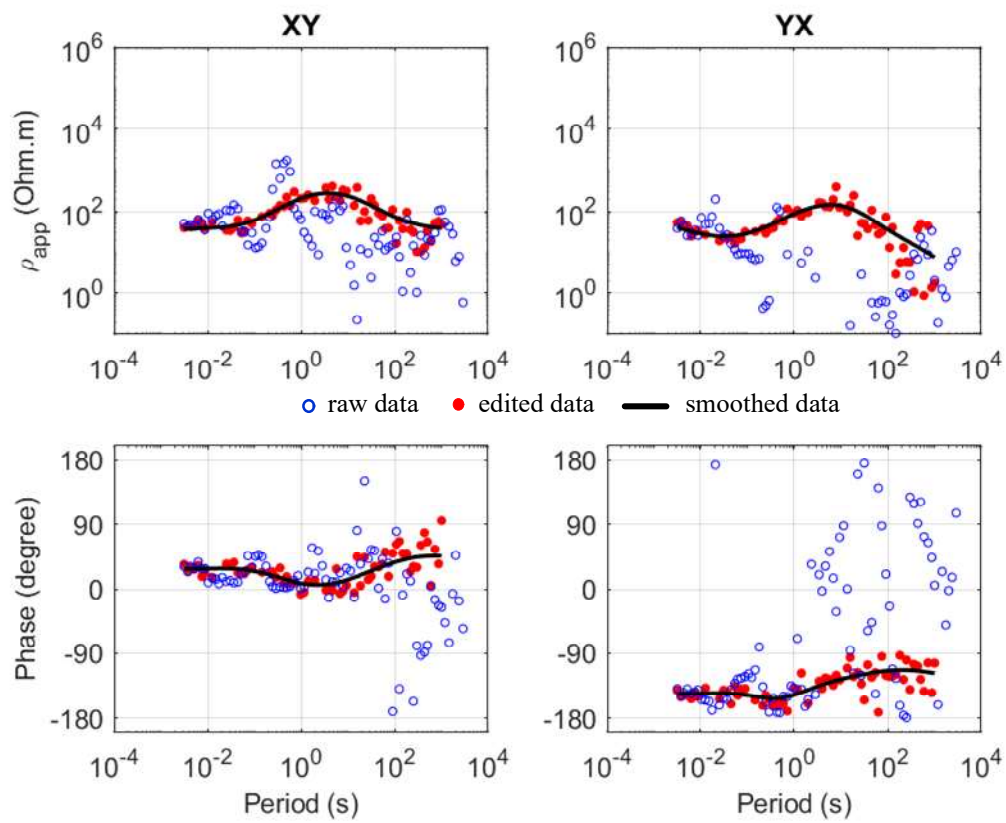

## MT-18

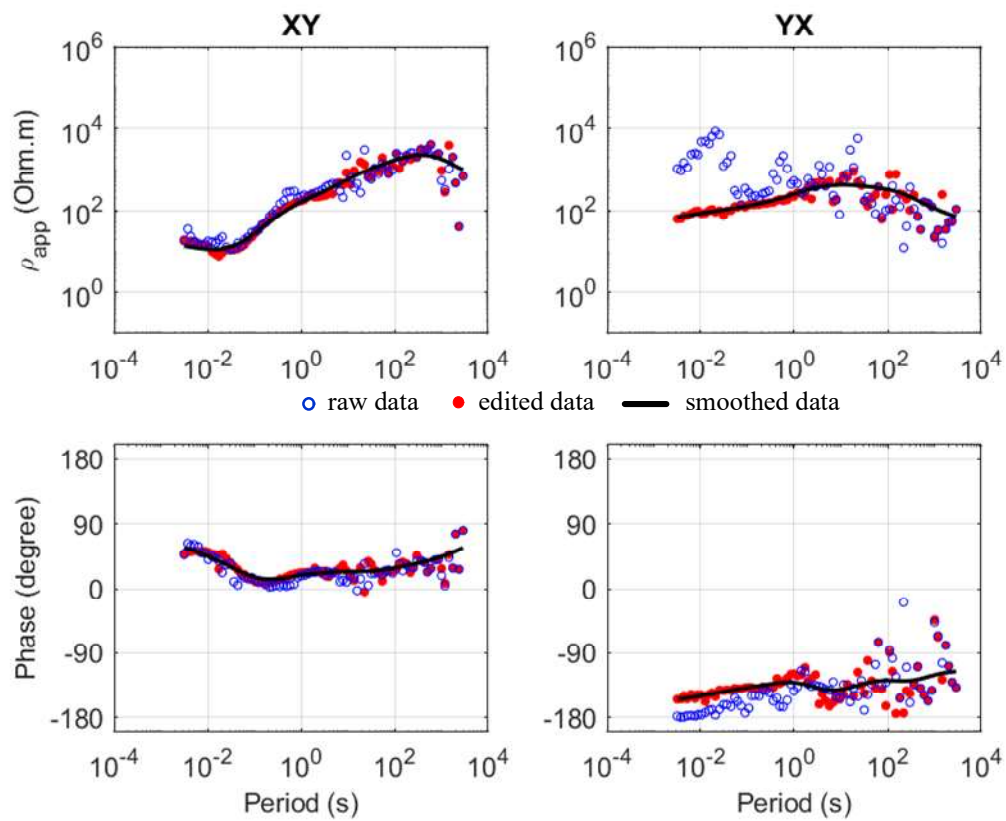

## MT-19

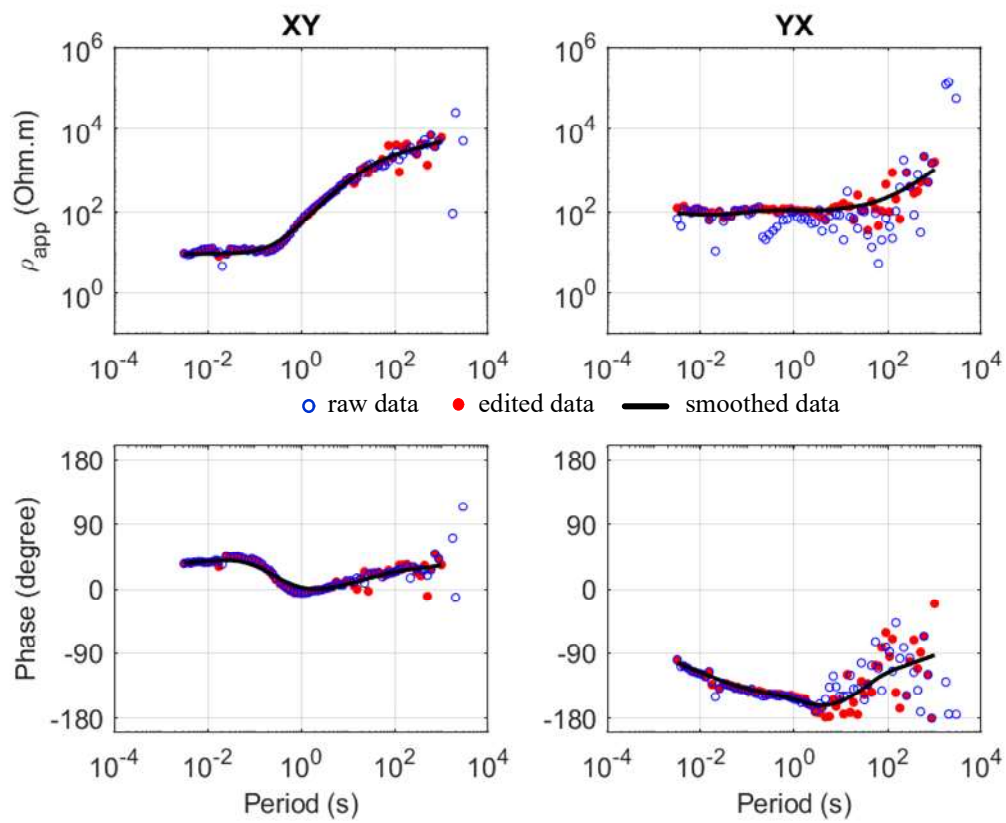

## MT-21

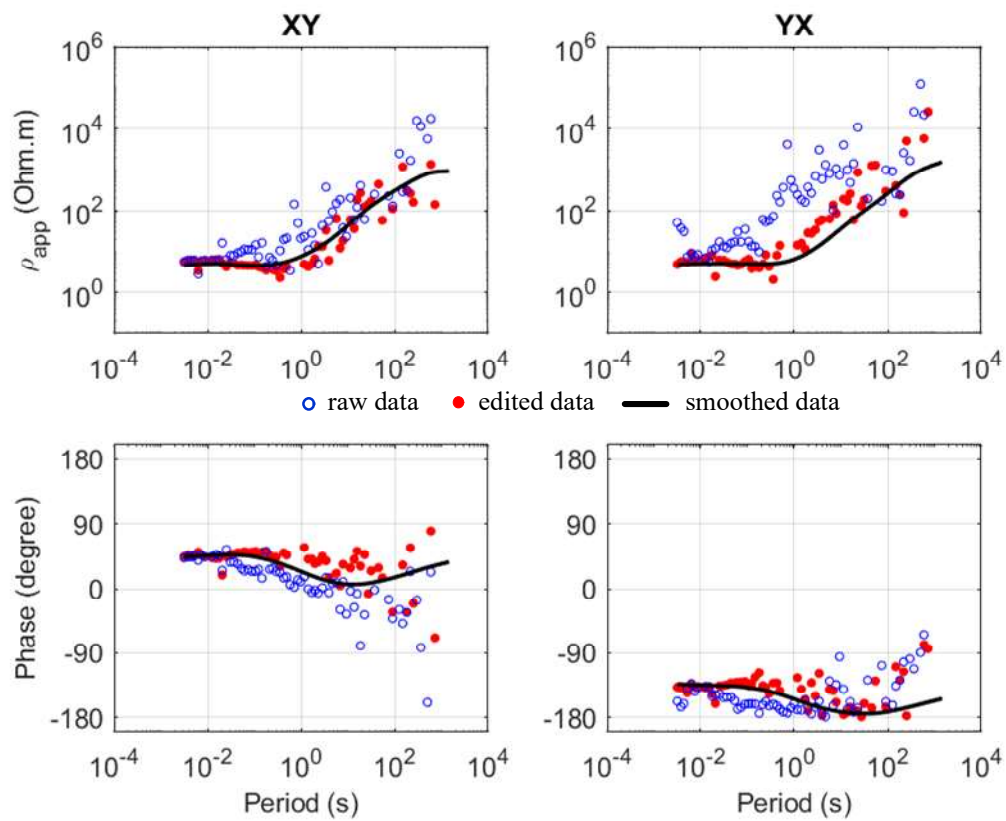



## MT-22

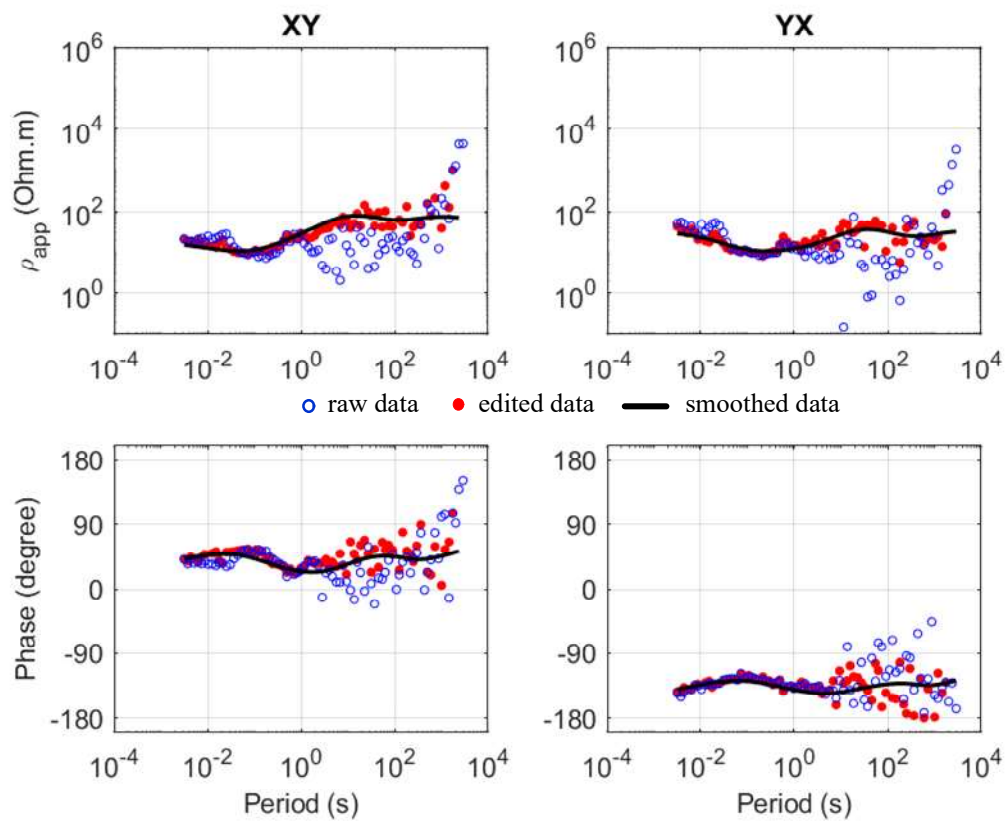

## MT-23

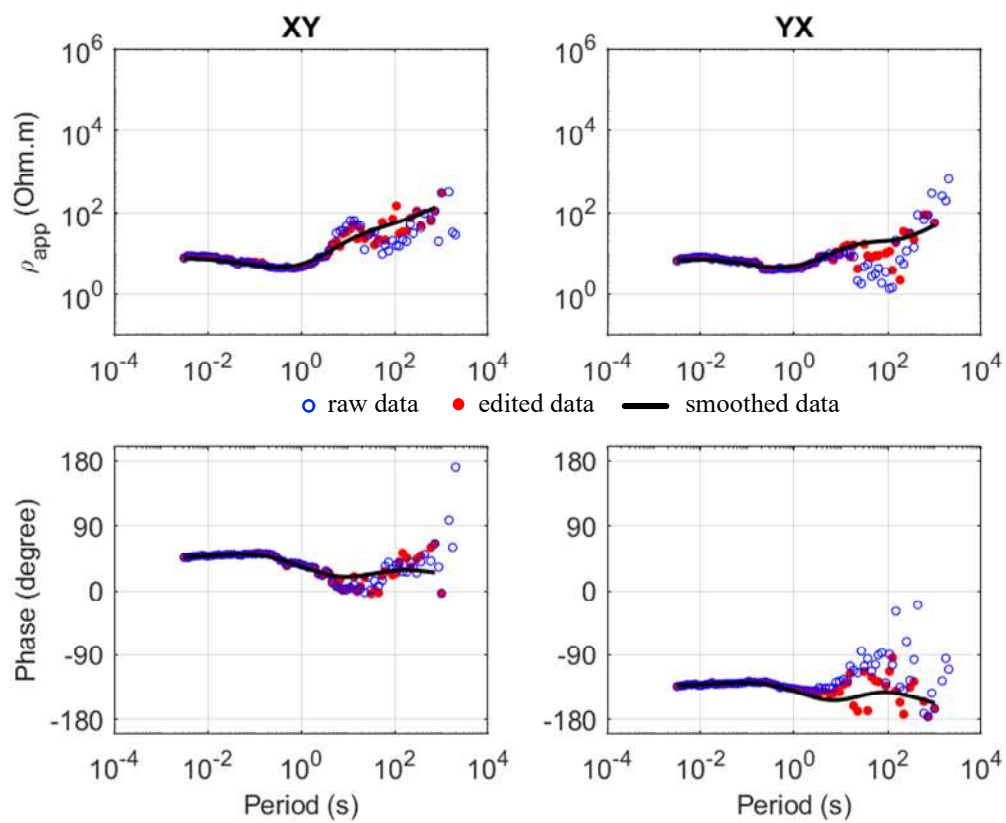

## MT-25

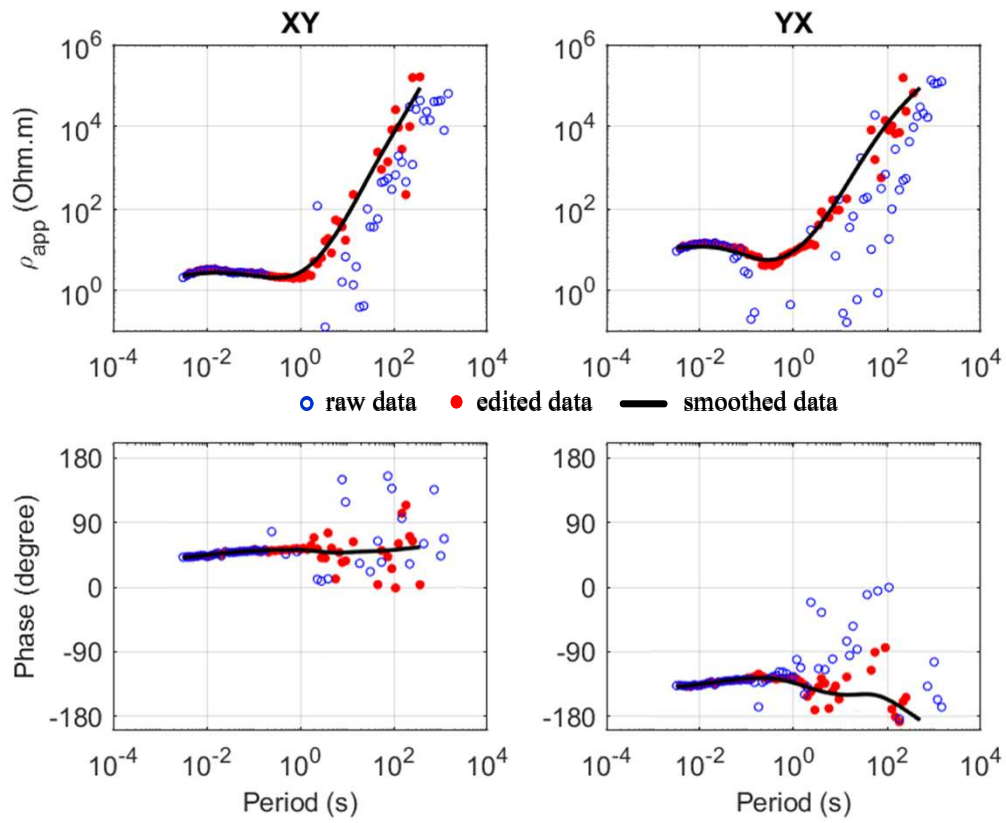

## MT-26

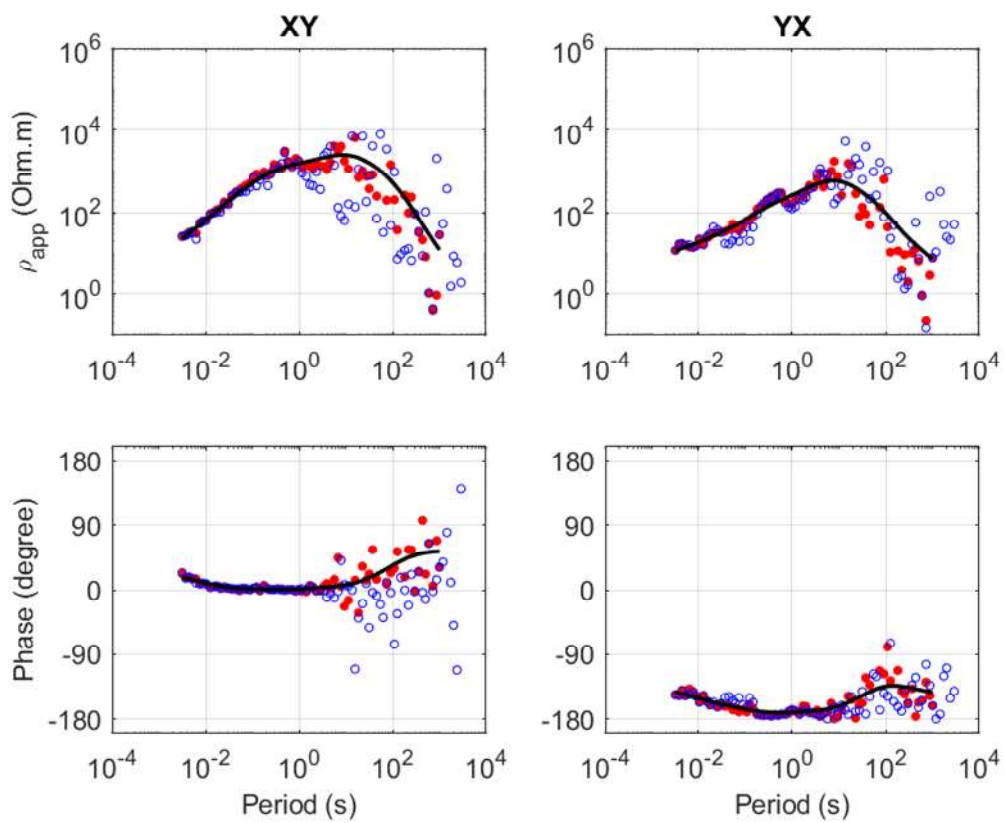

## MT-27

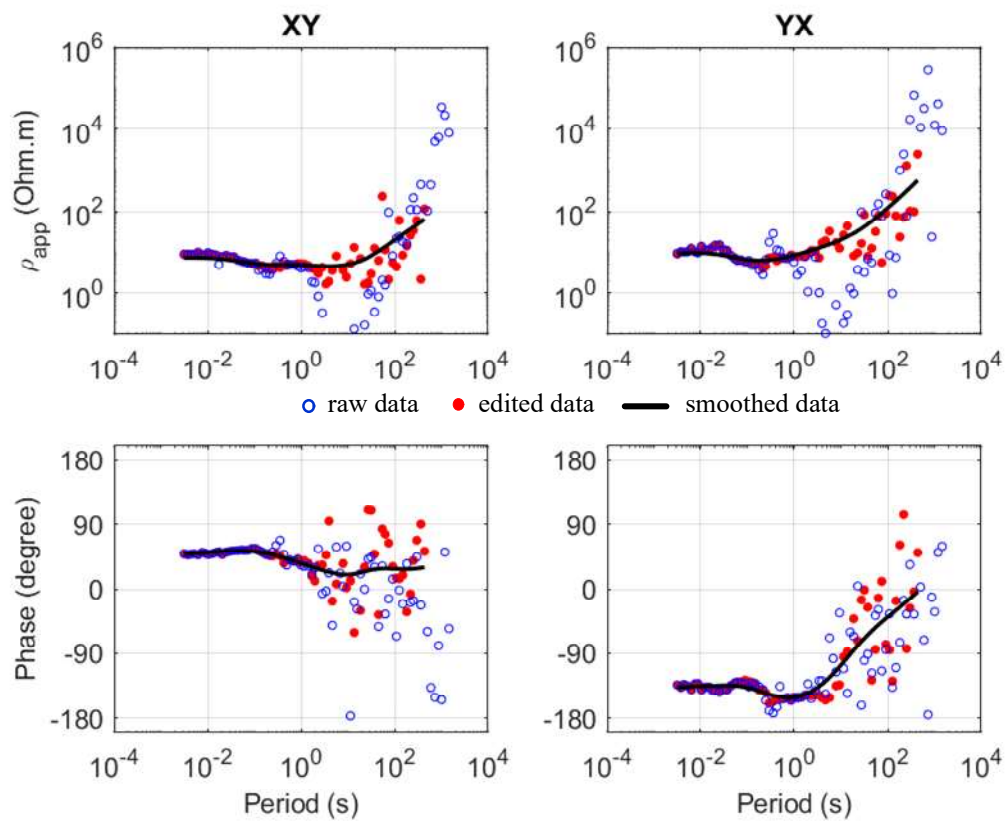

## MT-29

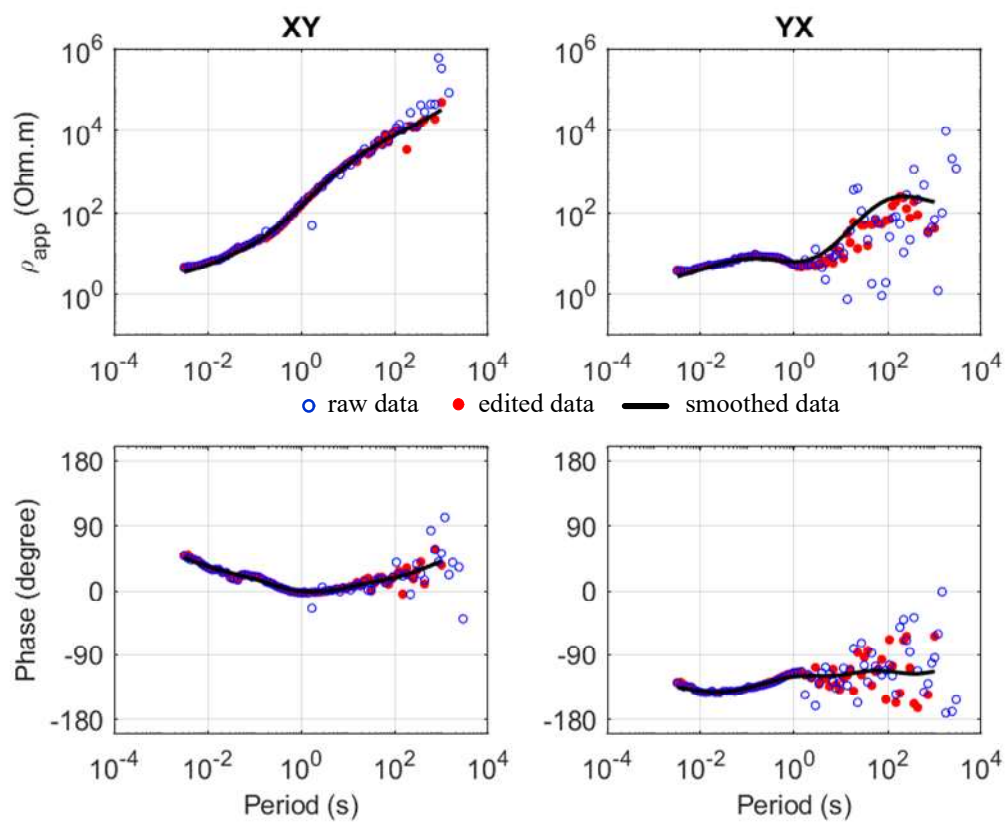



## MT-30

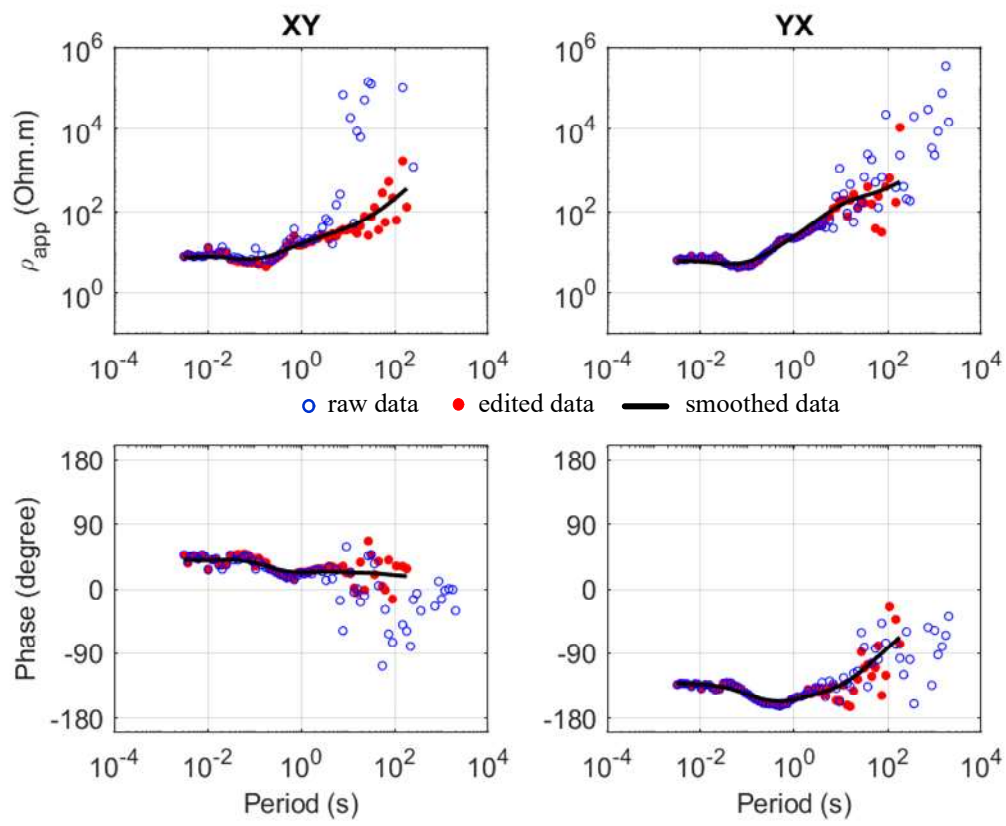

## MT-31

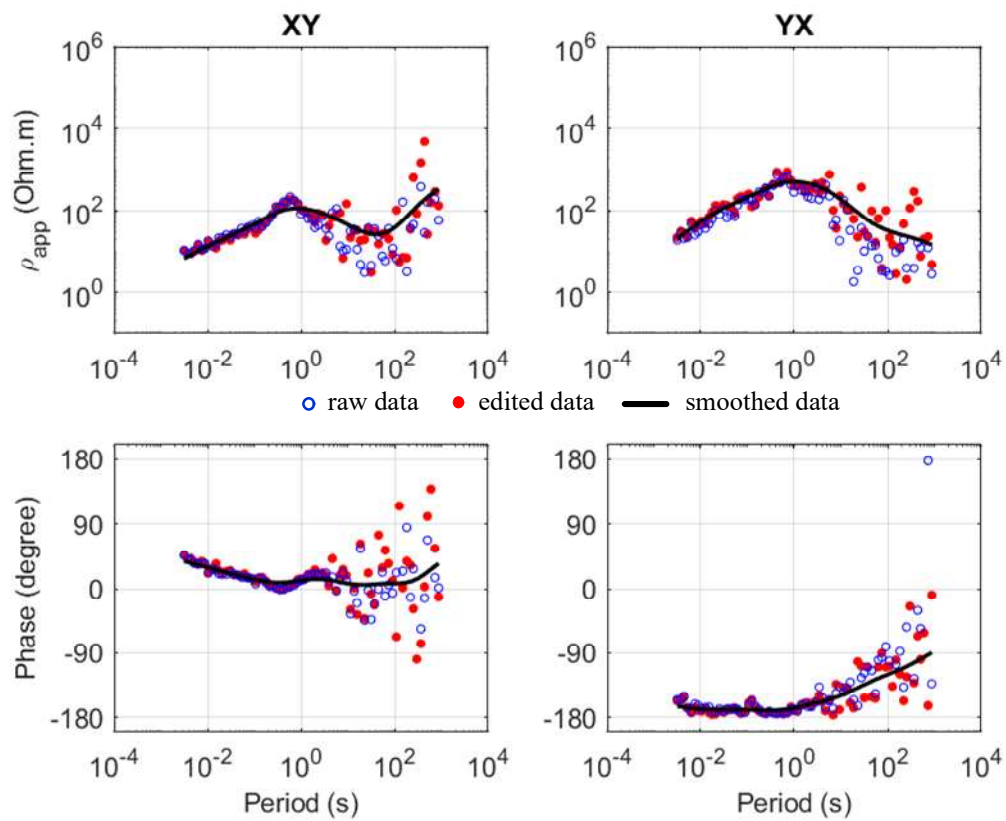

## MT-33

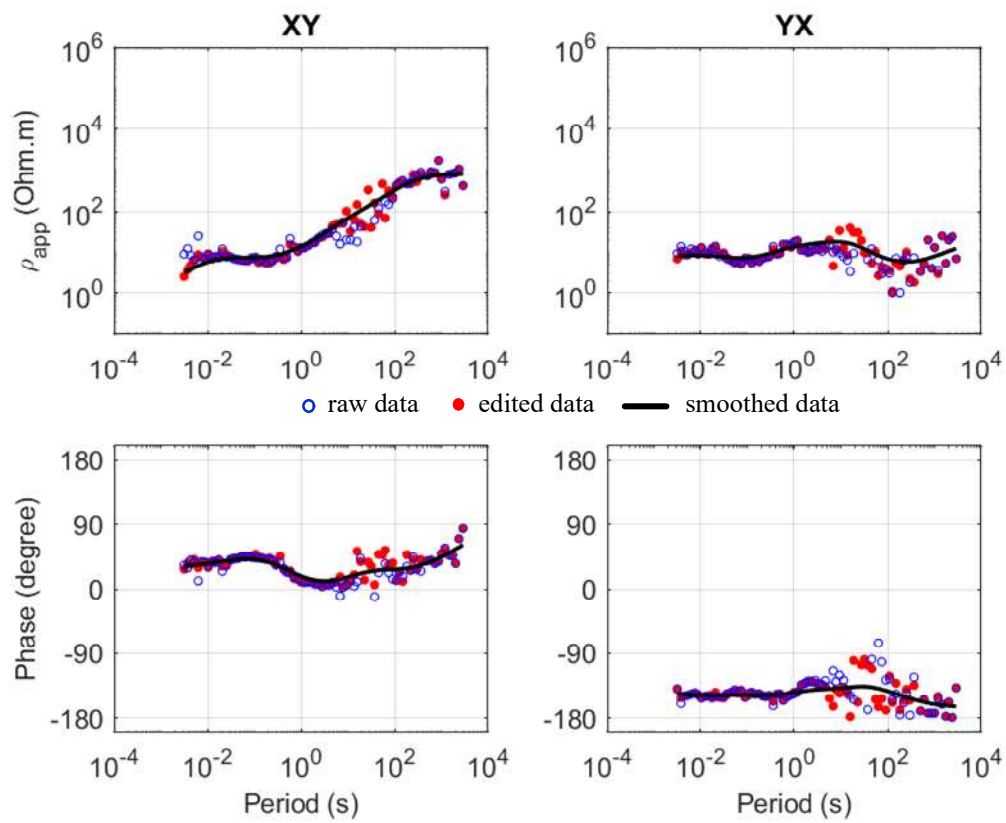

## MT-34

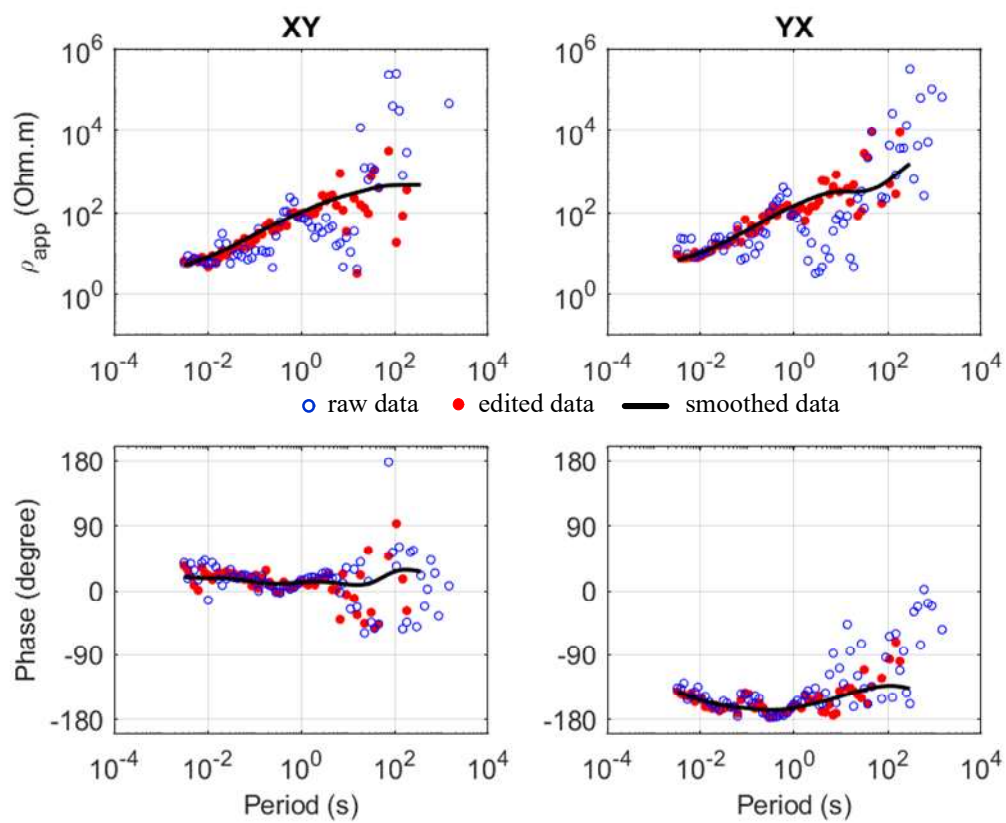

**Supplementary Material 2.** Apparent resistivity and phase fitting between observed and calculated data generated from 3D inversion for MT data from all MT stations. The blue solid line depicts observed field data, the green circles depict resampled data at the ten frequencies chosen, and the red solid line depicts calculated data.

## MT-01

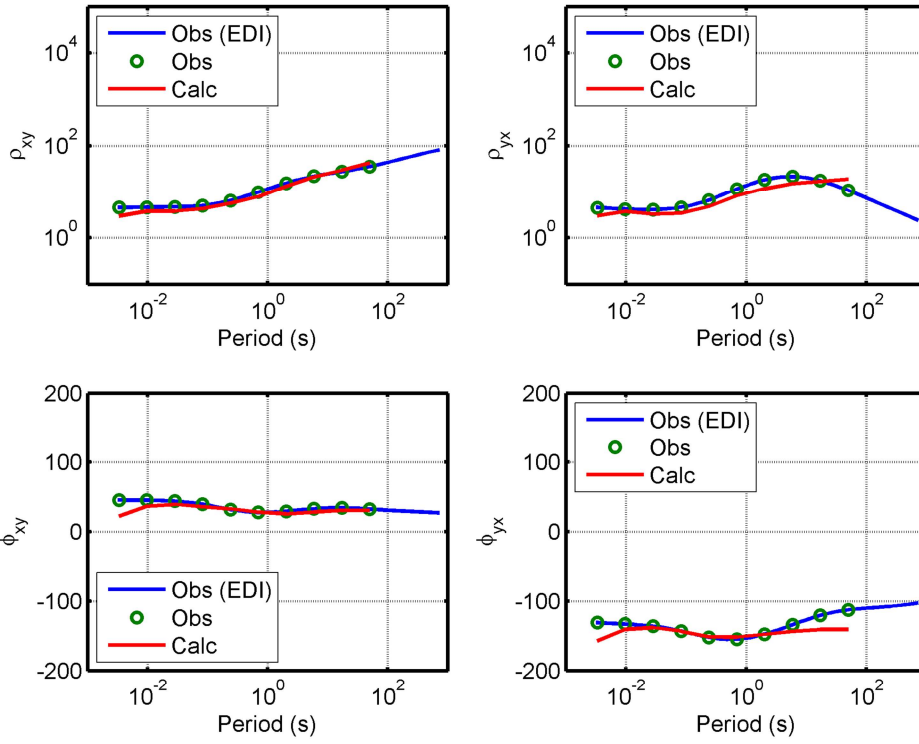

## MT-02

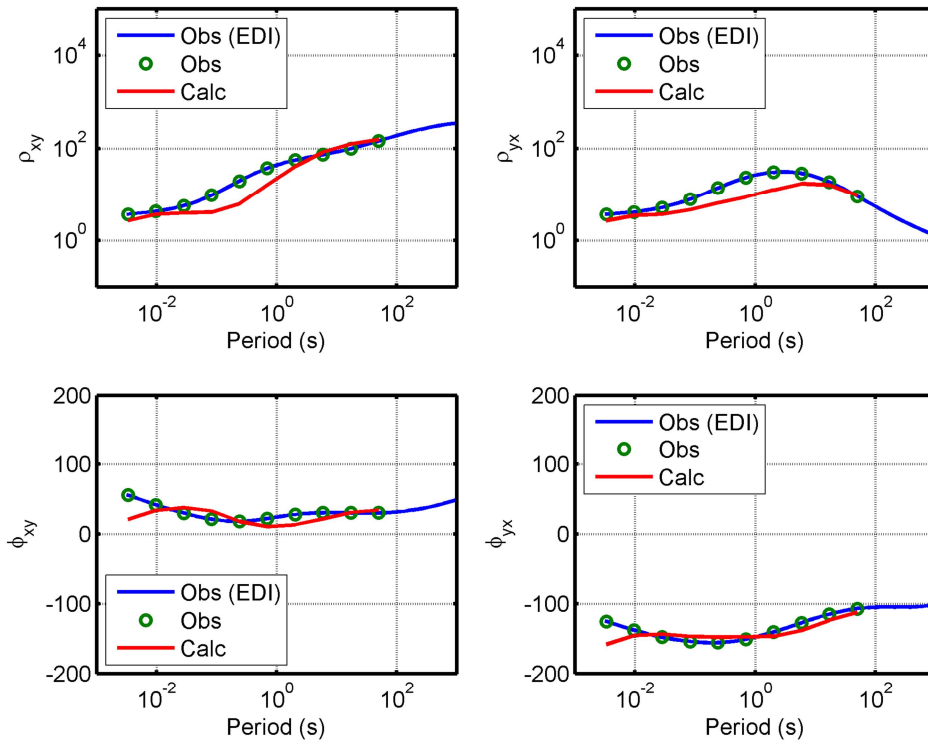

## MT-03

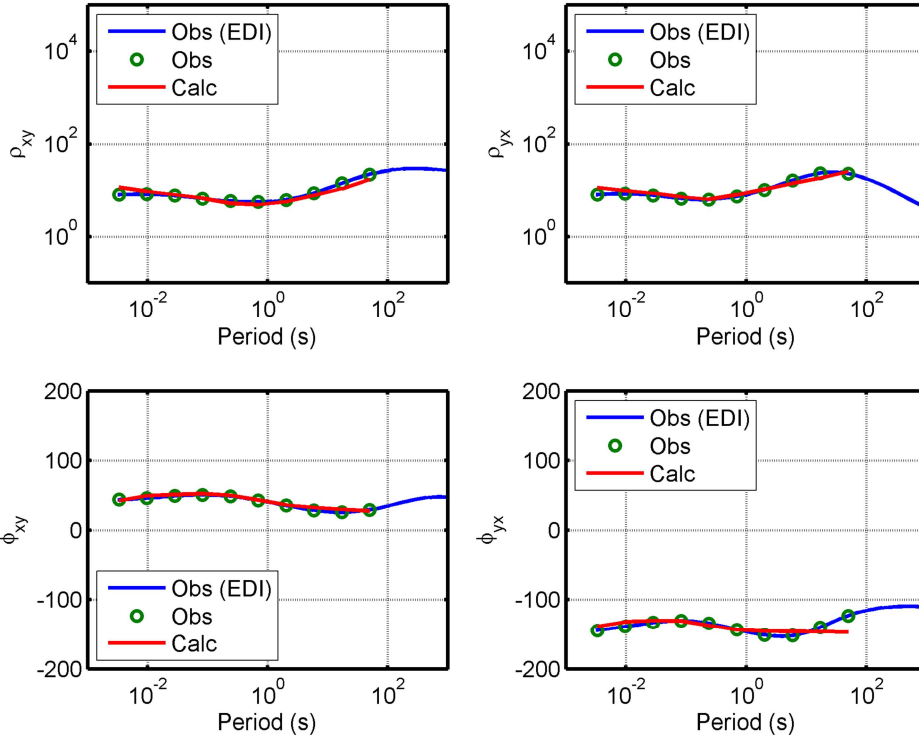

## MT-05

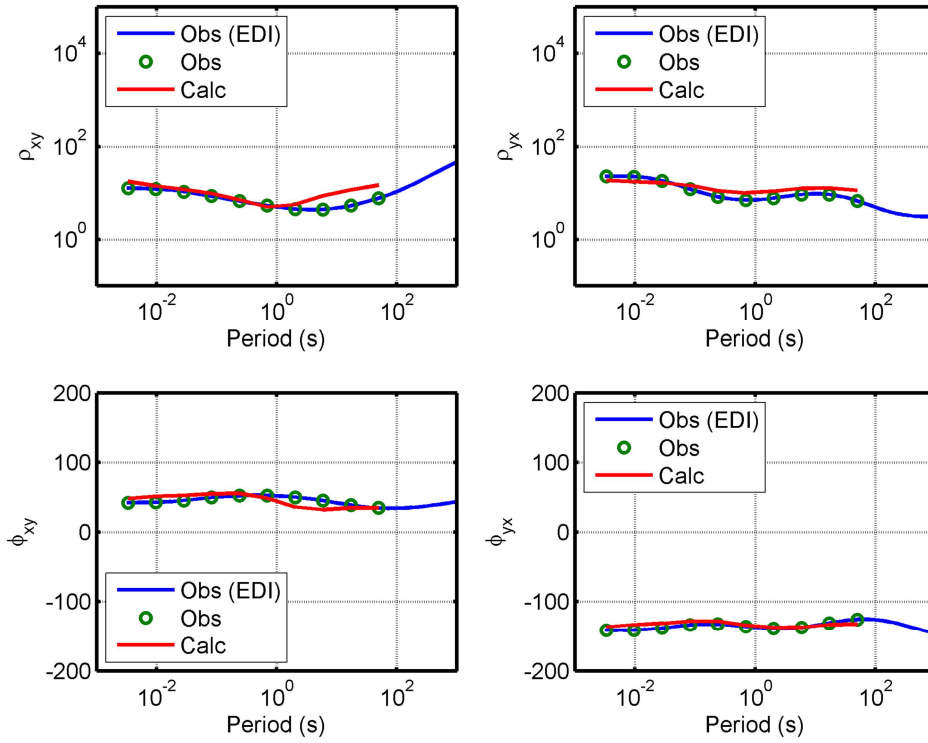

## MT-07

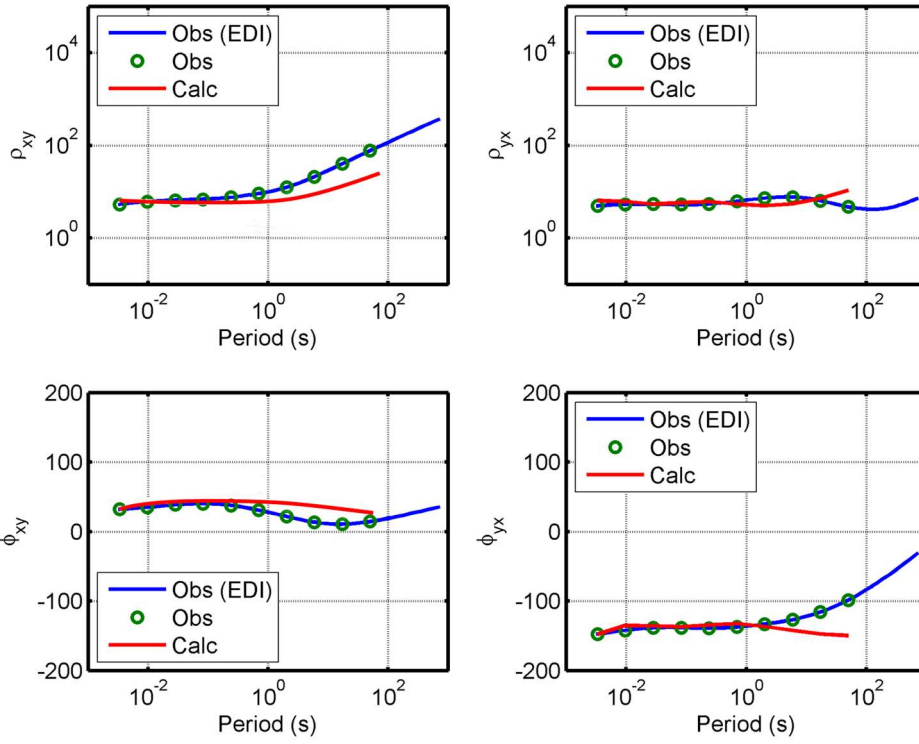

## MT-08

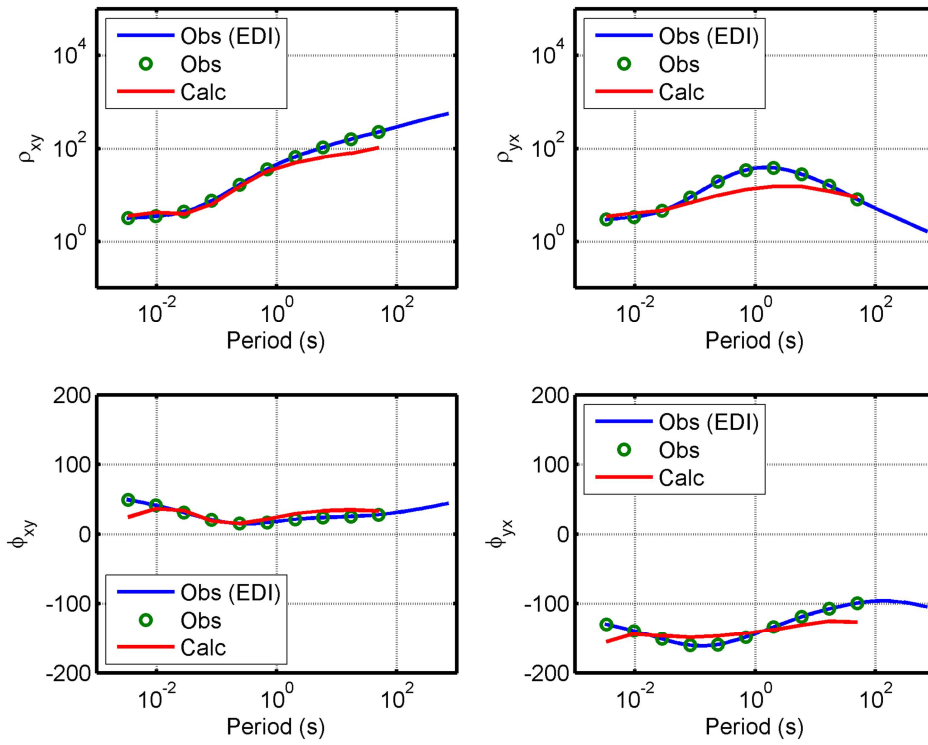

## MT-09

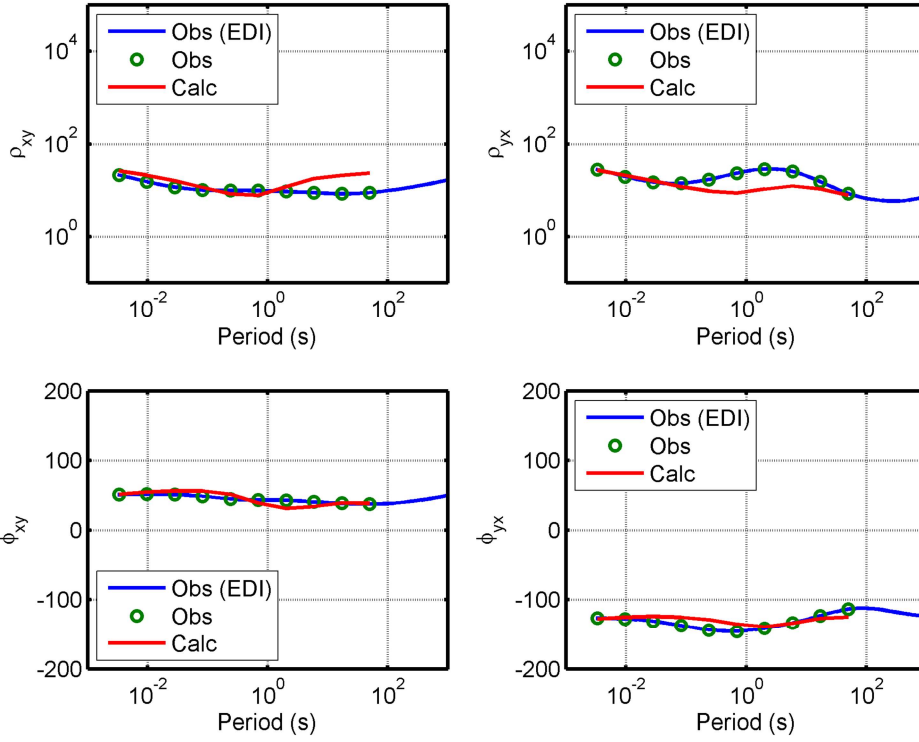

## MT-10

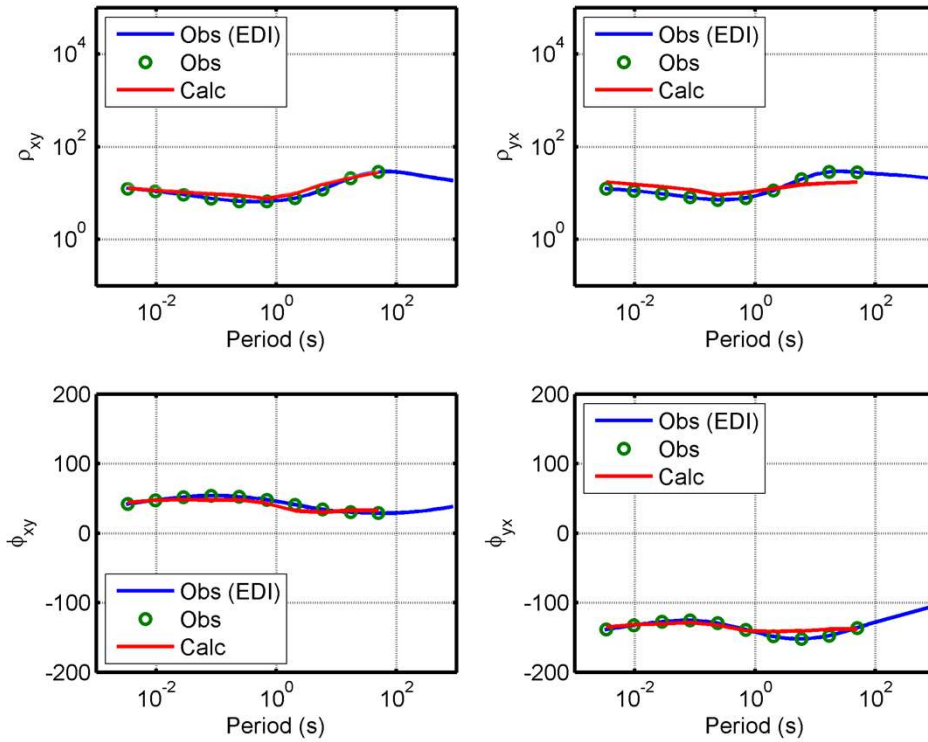

## MT-11

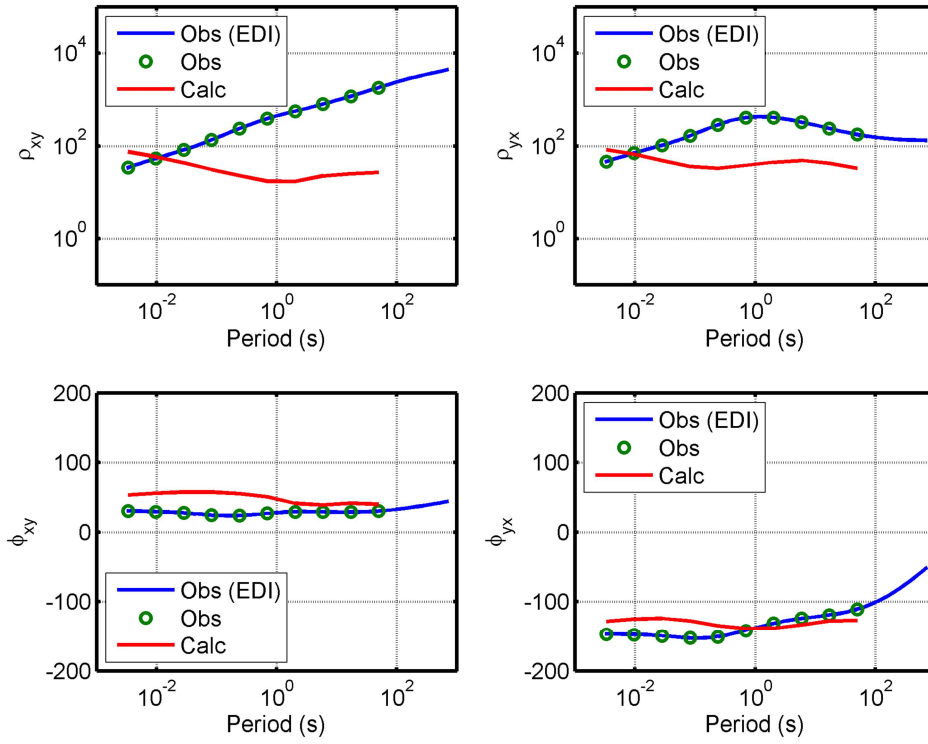

## MT-12

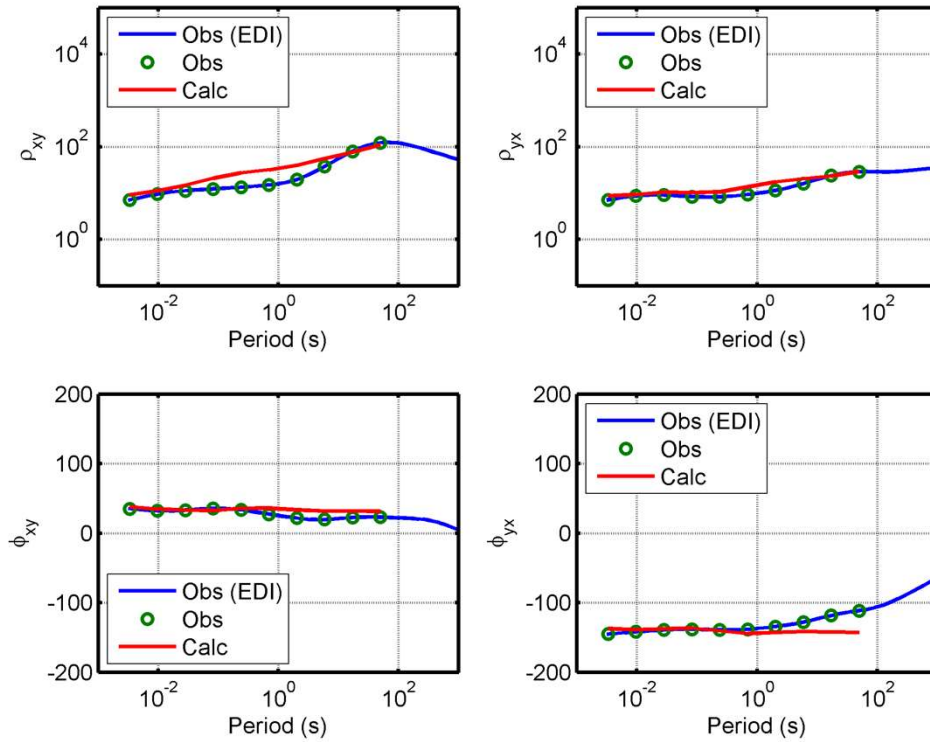



## MT-13

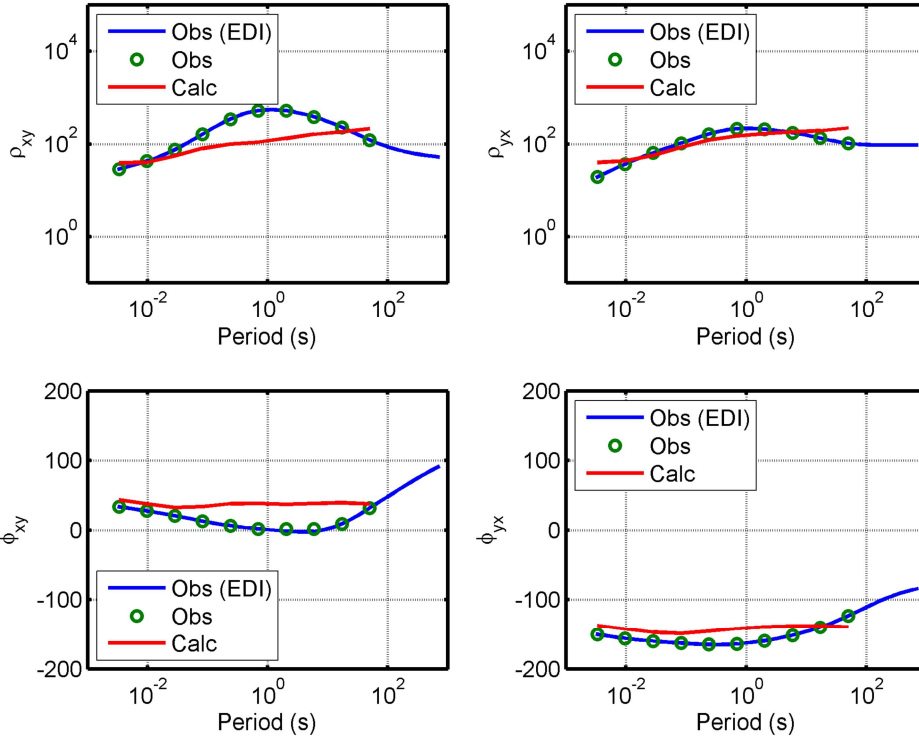

## MT-15

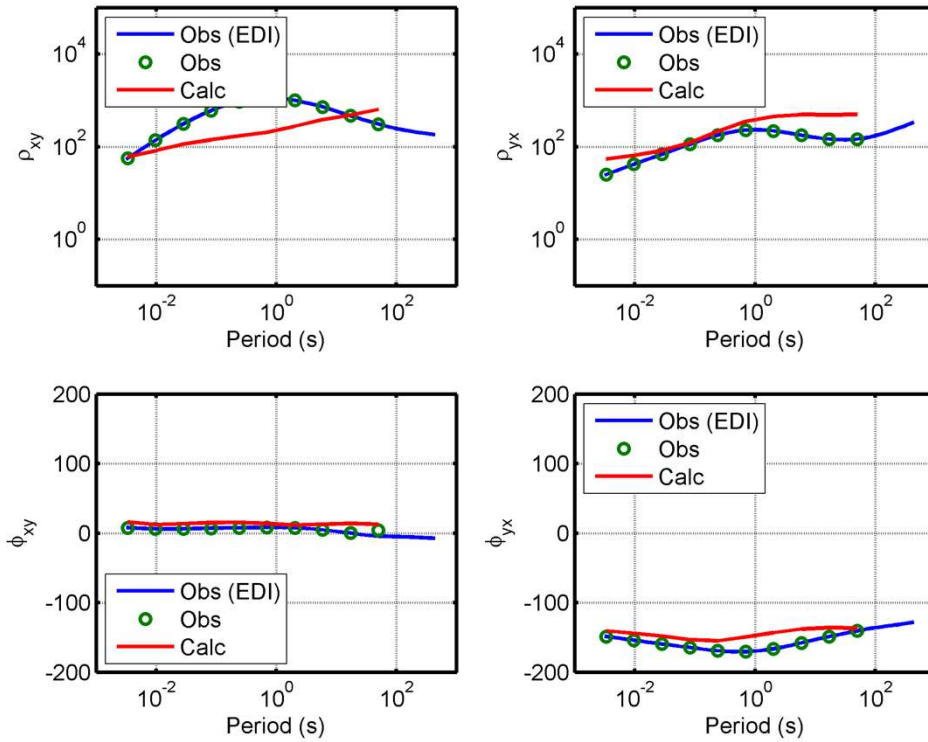

## MT-17

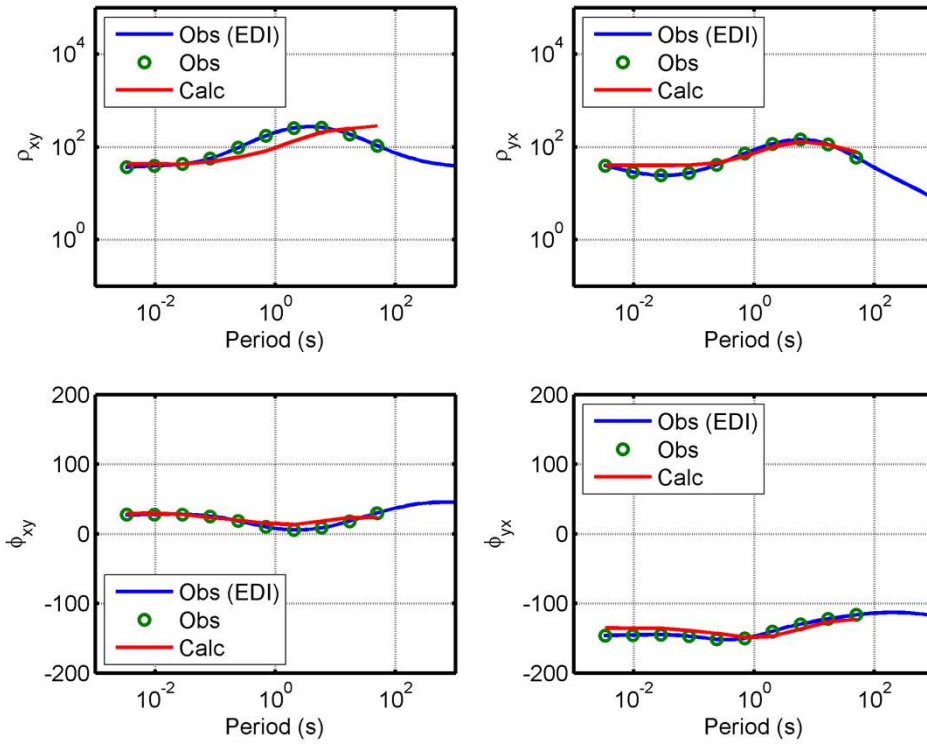

## MT-18

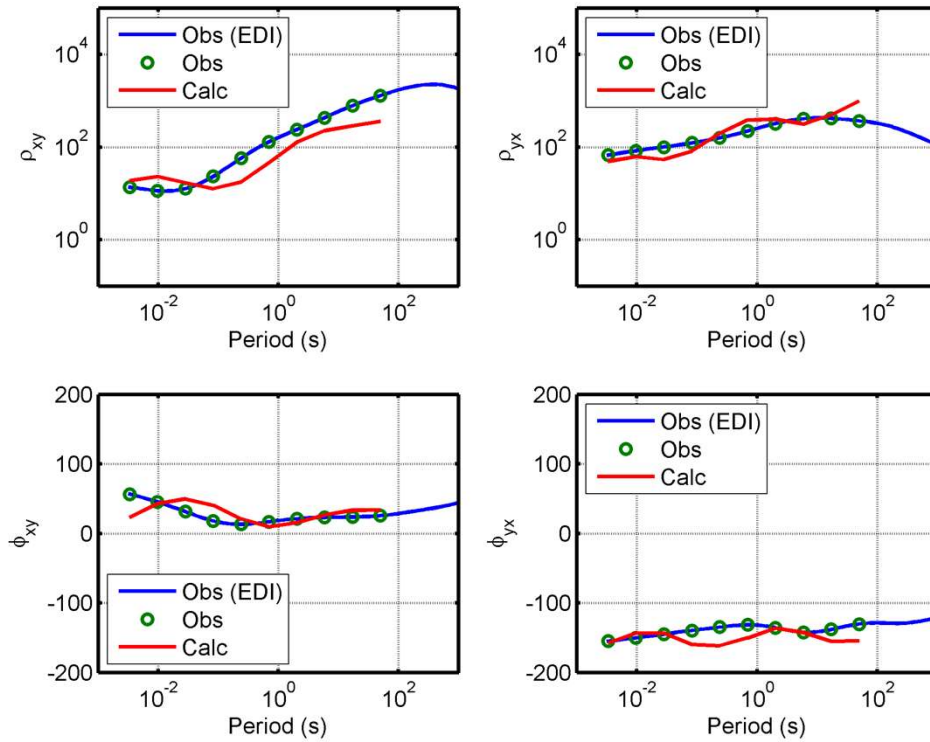

## MT-19

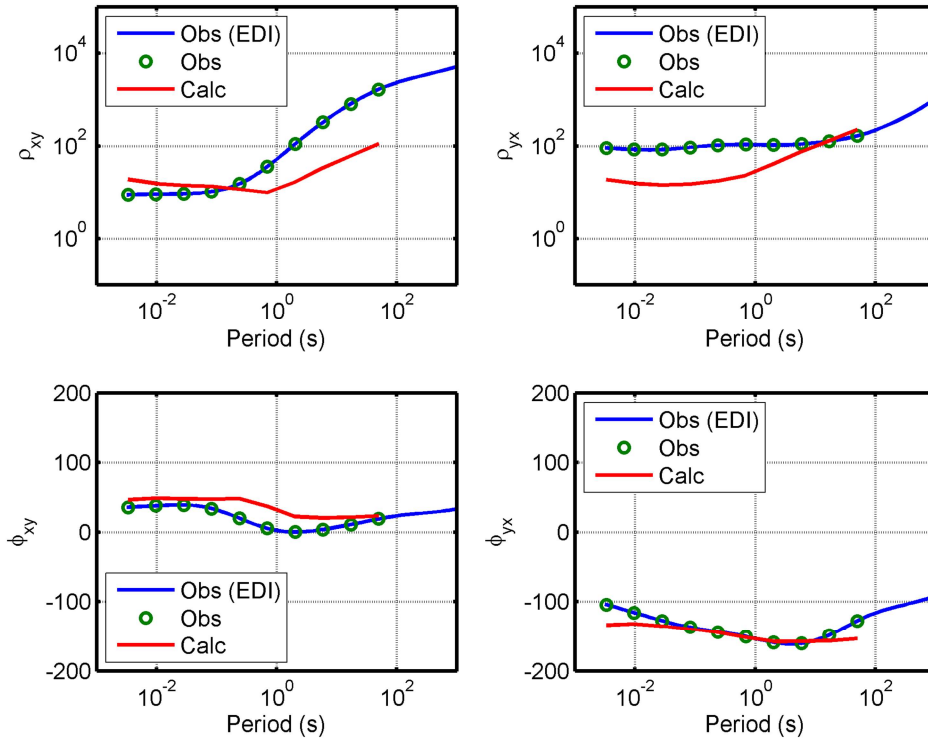

## MT-21

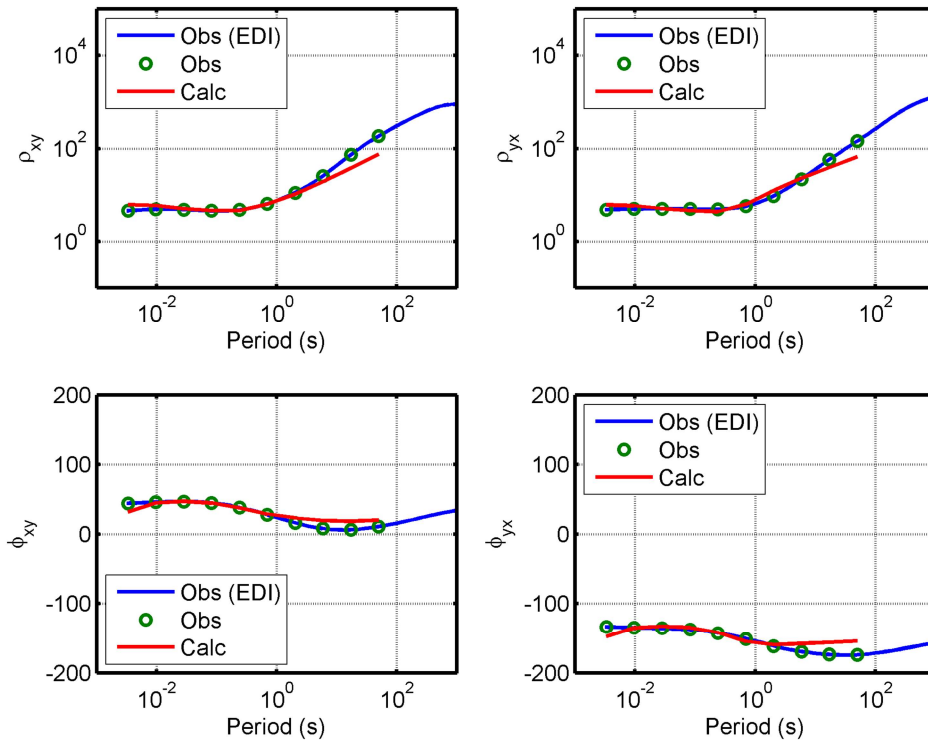

## MT-22

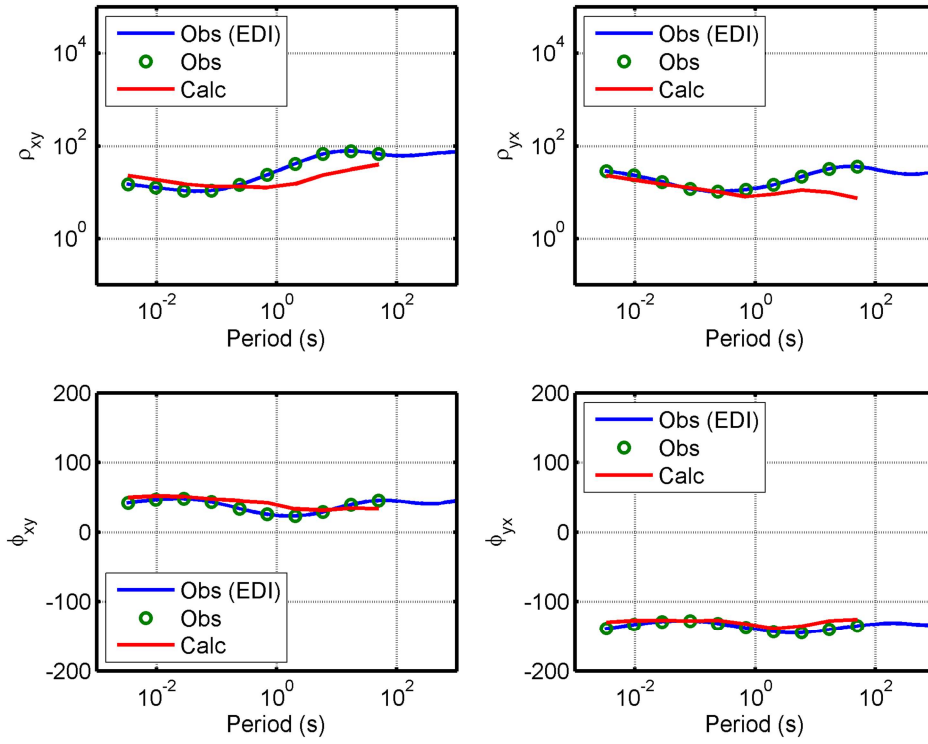

## MT-23

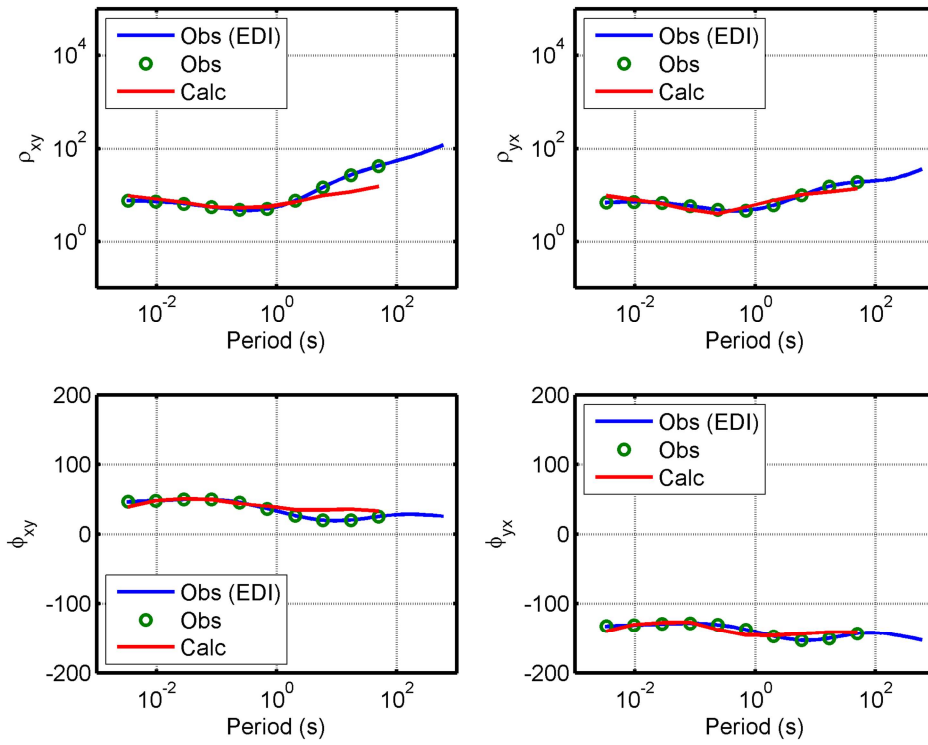

## MT-25

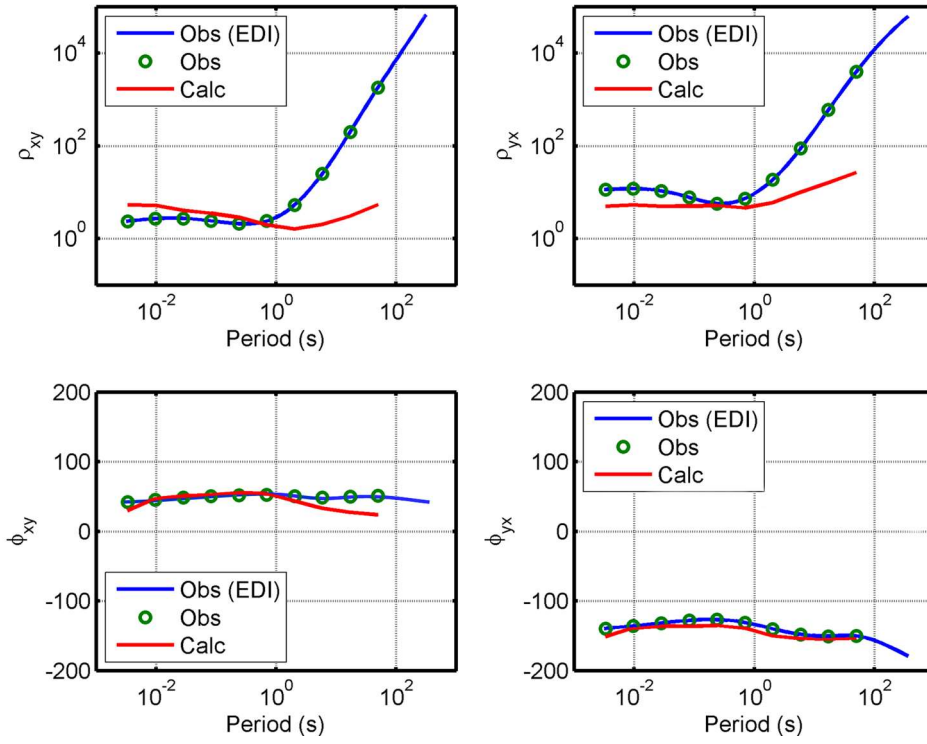

## MT-26

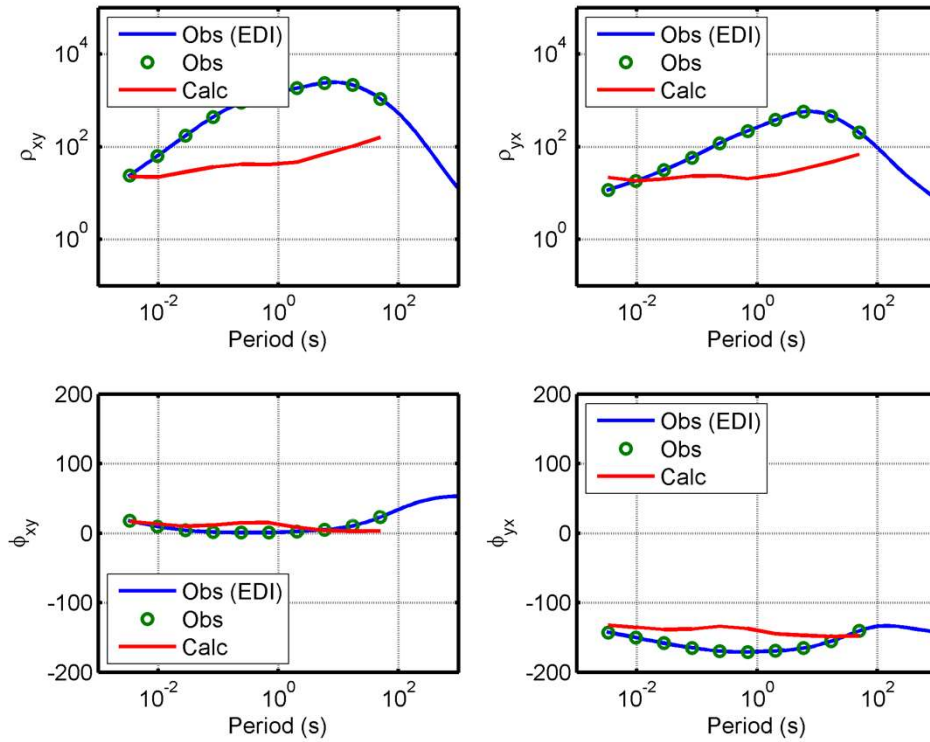

## MT-27

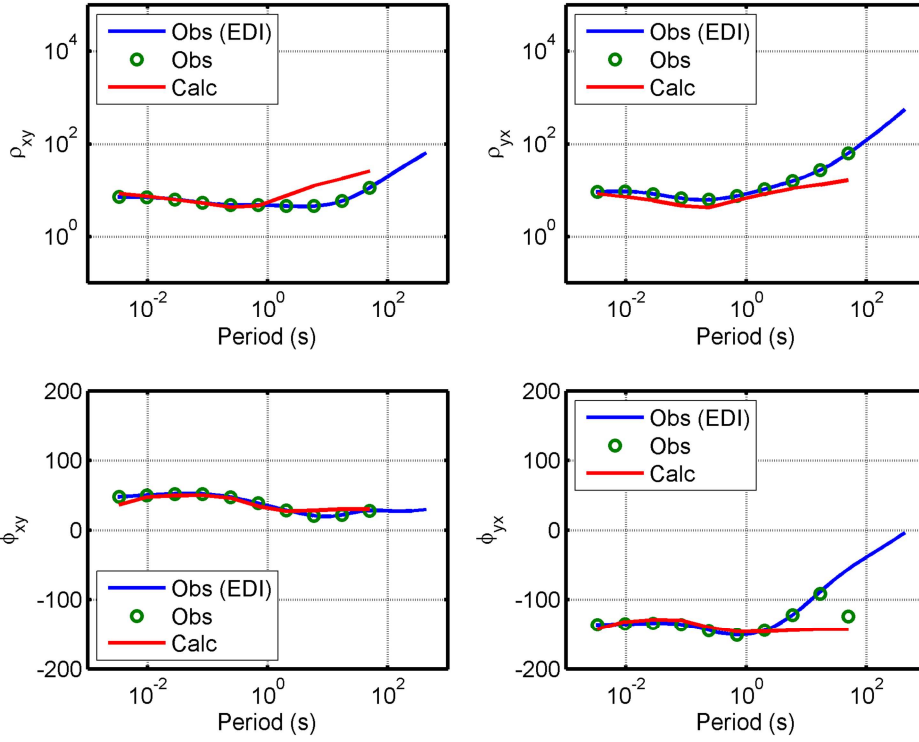

## MT-29

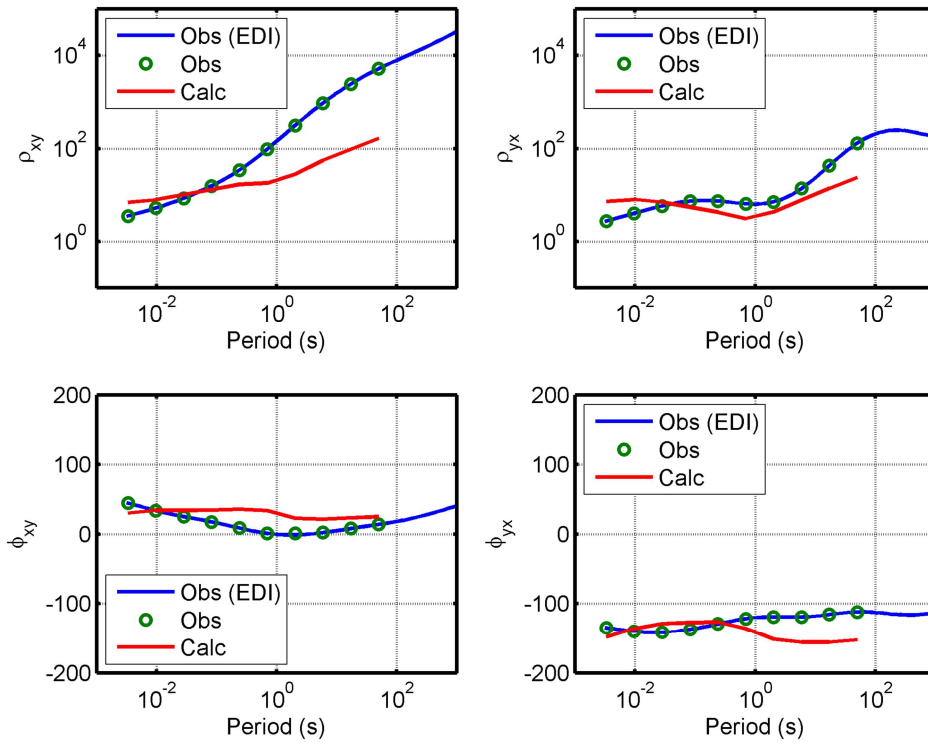

## MT-30

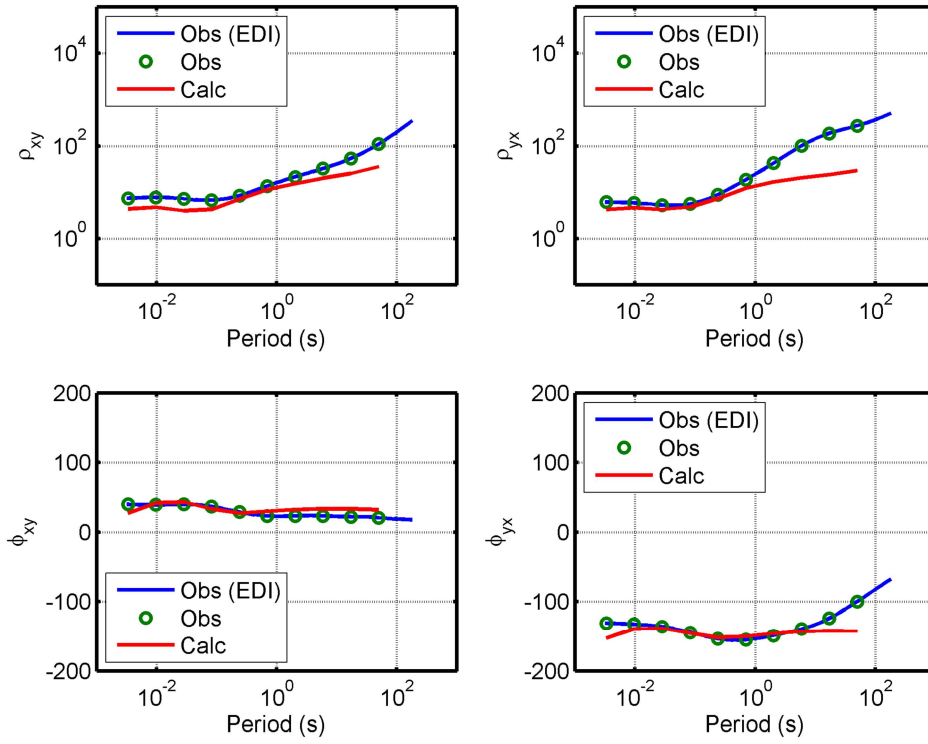

## MT-31

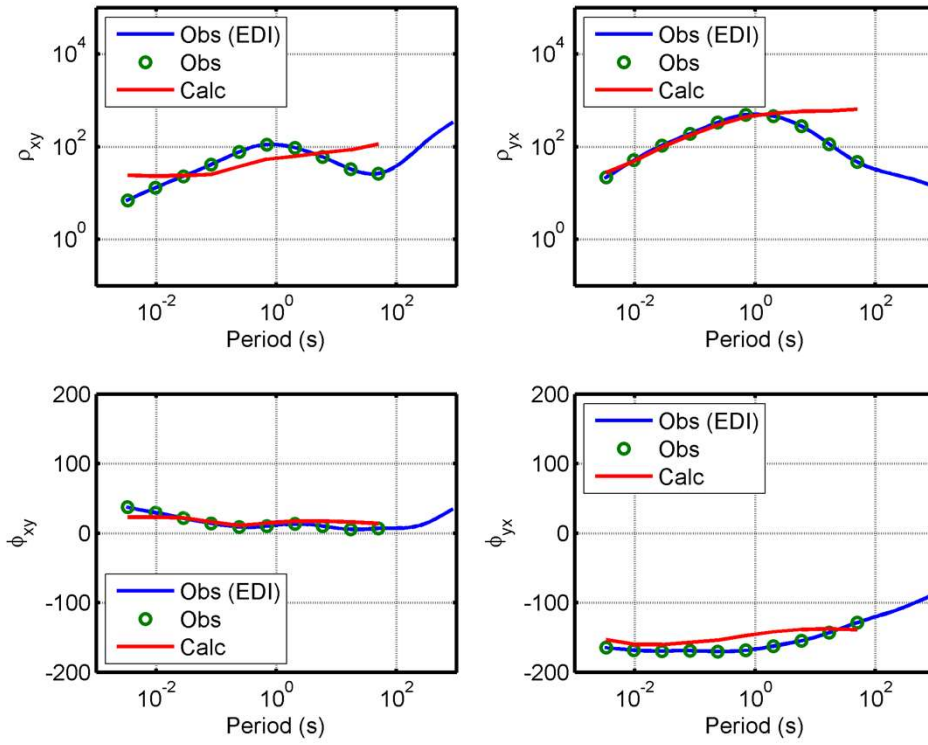



## MT-33

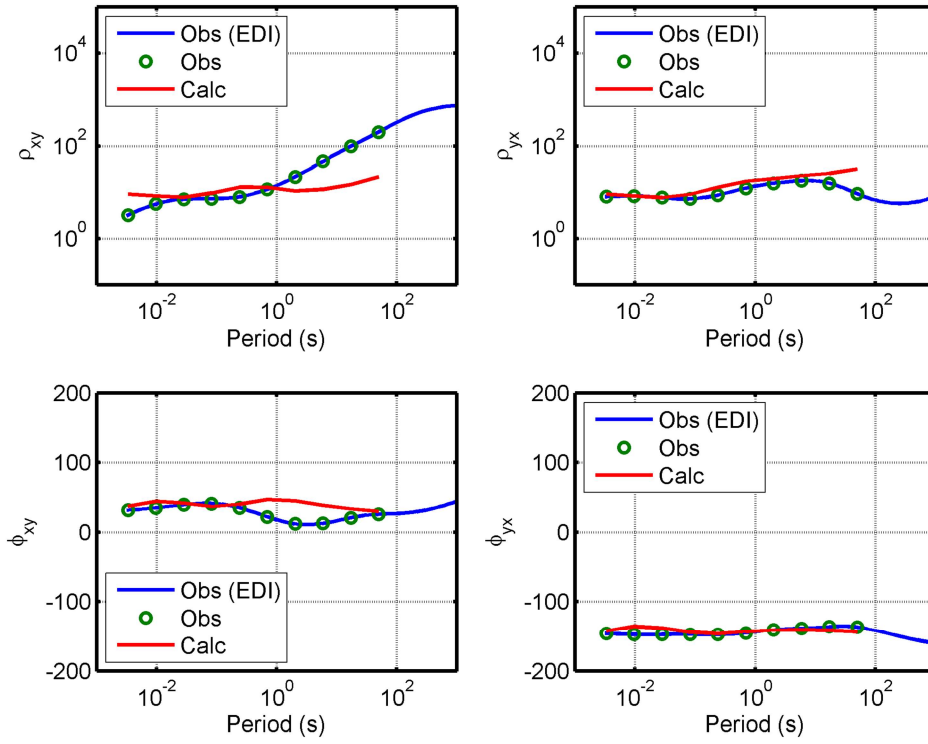

## MT-34

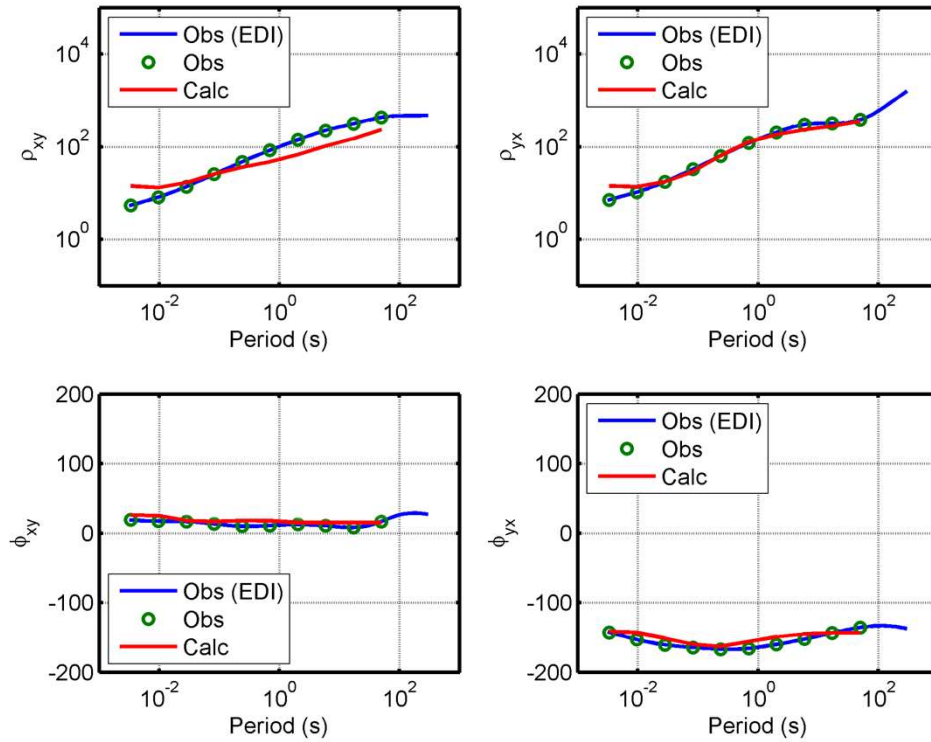



**Supplementary Material 3.** The comparison between the observed and the calculated data in terms of apparent resistivity and phase of impedance maps, as well as their RMS values for all periods.

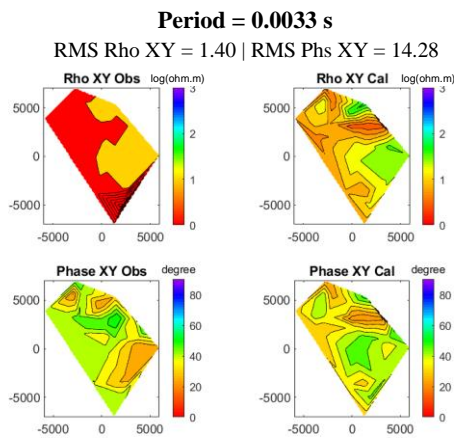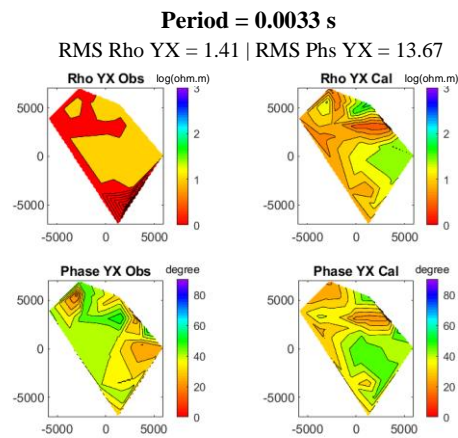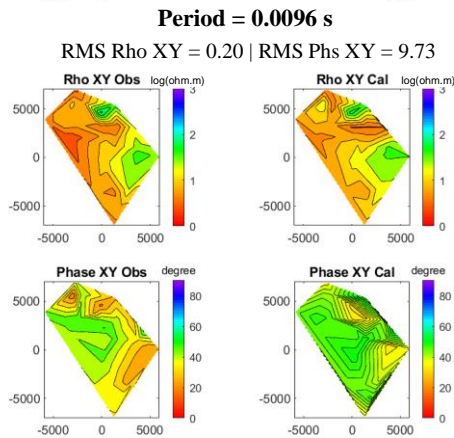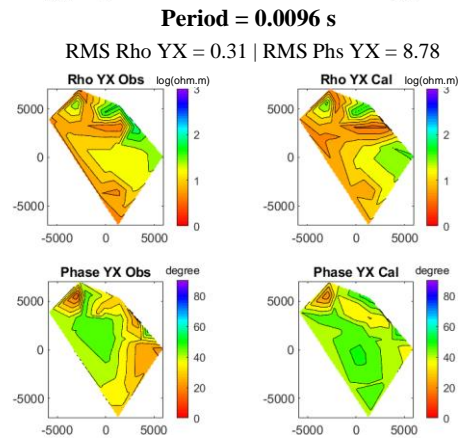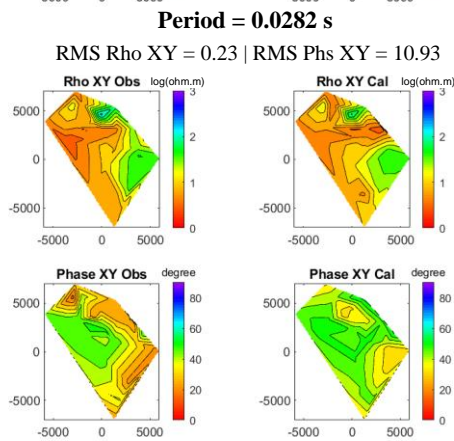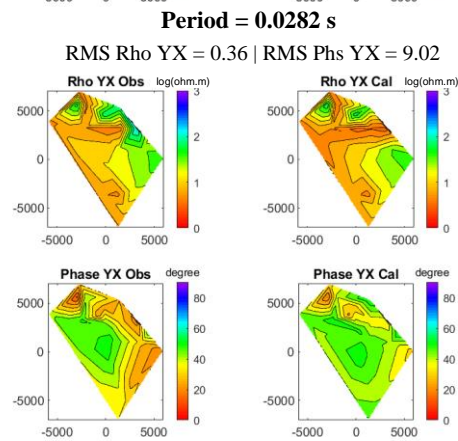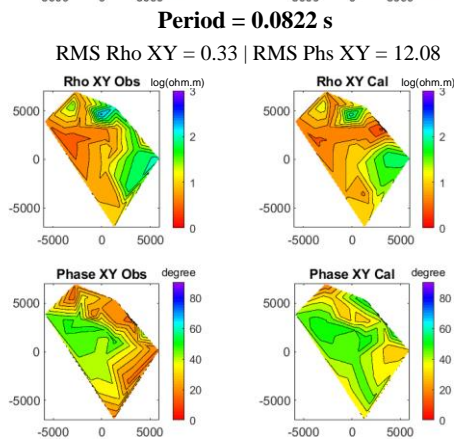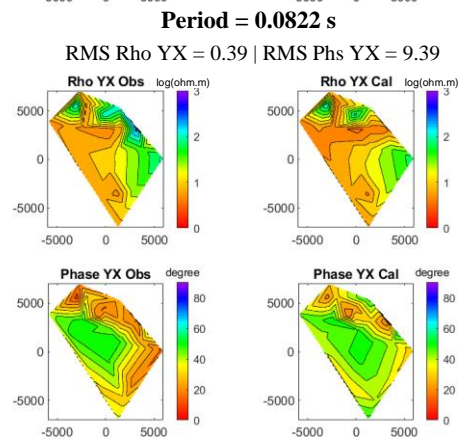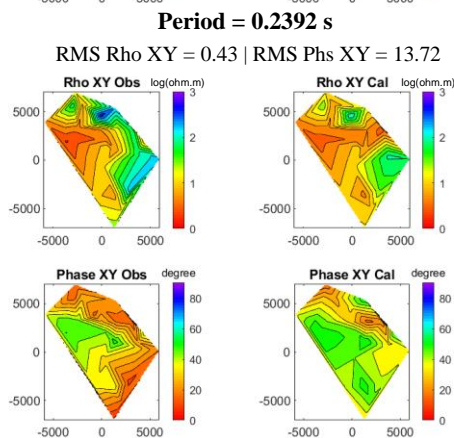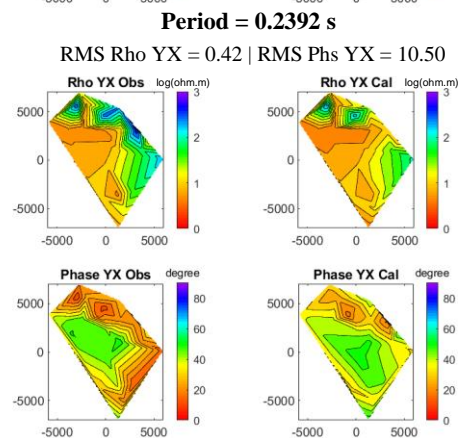

**Period = 0.8772 s**

RMS Rho XY = 0.52 | RMS Phs XY = 14.28

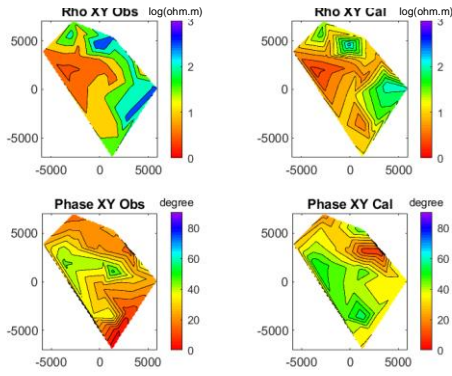

**Period = 0.8772 s**

RMS Rho YX = 0.48 | RMS Phs YX = 9.64

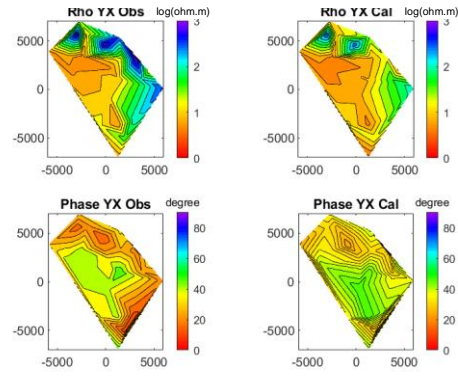

**Period = 2.0408 s**

RMS Rho XY = 0.61 | RMS Phs XY = 10.38

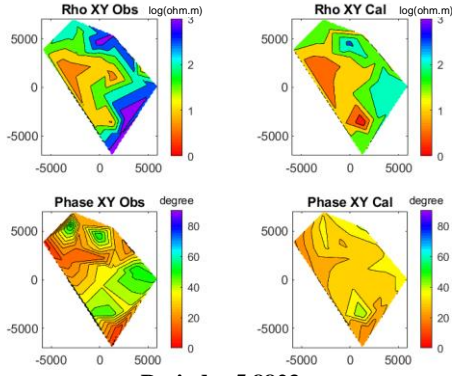

**Period = 2.0408 s**

RMS Rho YX = 0.55 | RMS Phs YX = 8.74

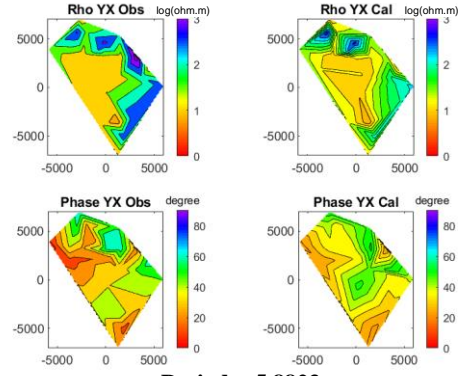

**Period = 5.8823 s**

RMS Rho XY = 0.65 | RMS Phs XY = 9.88

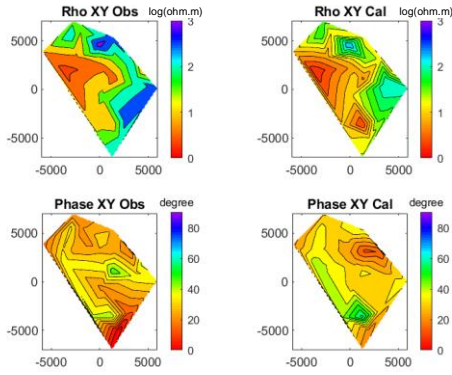

**Period = 5.8823 s**

RMS Rho YX = 0.61 | RMS Phs YX = 9.22

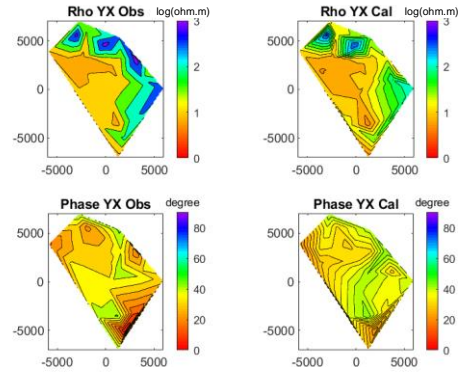

**Period = 16.6667 s**

RMS Rho XY = 0.70 | RMS Phs XY = 11.90

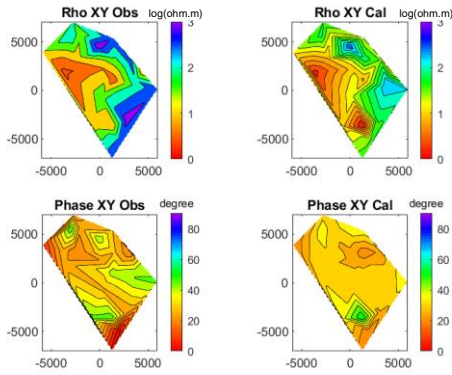

**Period = 16.6667 s**

RMS Rho YX = 0.62 | RMS Phs YX = 11.67

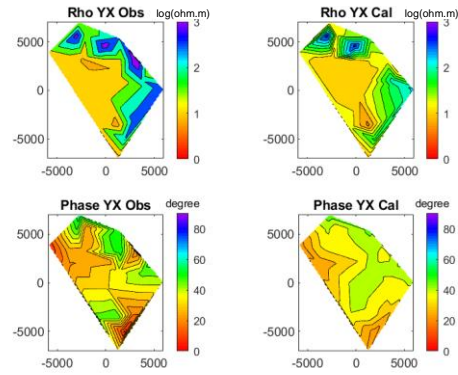

**Period = 50 s**

RMS Rho XY = 0.71 | RMS Phs XY = 13.78

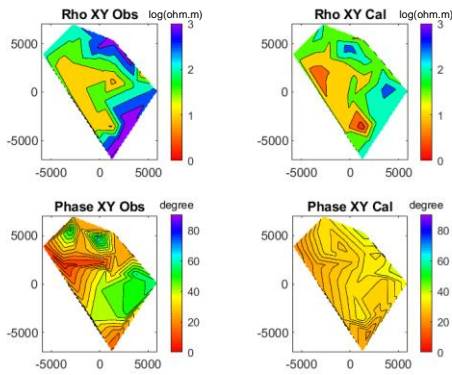

**Period = 50 s**

RMS Rho YX = 0.61 | RMS Phs YX = 14.88

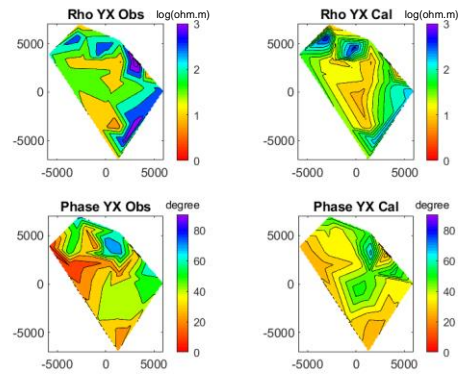

Supplement: s1 [file s1]
